# Supplementary material for: Cell and tissue type independent age-associated DNA methylation changes are not rare but common
Source: Aging (Albany NY). 2018 Nov 27;10(11):3541–57. doi: 10.18632/aging.101666 (PMC6286821; doi:10.18632/aging.101666)
Supplement: Supplementary Table S1 [file aging-10-101666-s001.xlsx]

## Sheet: refBrain
	NeuN_neg	NeuN_pos
cg12646786	0.0082557	0.902993
cg02689072	0.938007	0.0708776
cg09671951	0.0386523	0.769945
cg05403655	0.91705	0.0725487
ch.2.81927627R	0.0177244	0.85666
cg00968638	0.0222454	0.856855
cg13962347	0.0255198	0.847422
cg12093060	0.923411	0.0839438
ch.16.74794652R	0.0761633	0.854105
cg03556243	0.0270622	0.807371
cg25124228	0.967737	0.160926
cg15824323	0.929377	0.211812
cg00256675	0.939643	0.117079
cg24624505	0.0386028	0.868054
cg15910502	0.035033	0.851886
cg20445094	0.965258	0.214502
cg26662324	0.0185932	0.836515
cg05940691	0.921773	0.109332
cg13470557	0.913956	0.147615
cg15405572	0.101614	0.880676
cg02997585	0.90324	0.111106
cg23389651	0.039396	0.835191
cg06255601	0.0379852	0.885
cg07753525	0.952122	0.212155
cg13437525	0.0161699	0.784719
cg21370924	0.0339346	0.779747
cg13114028	0.9637	0.134234
cg15384589	0.0733639	0.890264
cg03655701	0.0407284	0.881392
cg03202732	0.0453306	0.893168
cg19552640	0.0438068	0.900975
cg23501051	0.913841	0.0396145
cg10938486	0.0767295	0.8762
ch.2.189510808F	0.0364874	0.866593
cg05370101	0.0386578	0.88623
cg18771737	0.956365	0.213469
cg18831134	0.941144	0.199332
cg15624160	0.958516	0.197783
cg19658522	0.88469	0.136683
cg00760872	0.0359182	0.896367
cg04347414	0.875074	0.148388
cg01833689	0.107181	0.878178
cg08647349	0.0372789	0.878131
cg15647296	0.0331555	0.853449
ch.5.23452154R	0.012813	0.83849
cg15320905	0.942211	0.160102
cg02567488	0.0325258	0.896879
cg07905696	0.0559598	0.853686
cg27649971	0.0513522	0.849691
cg04408104	0.0205984	0.843759
cg07103201	0.0838263	0.905887
cg00478851	0.023713	0.75695
ch.4.172823451R	0.061848	0.885977
cg23749046	0.958345	0.131545
cg20388732	0.0522195	0.861463
cg21396630	0.962219	0.151219
cg12975603	0.968585	0.151732
cg08203192	0.915503	0.0860833
cg16198723	0.0431204	0.811644
cg26284390	0.0192408	0.781251
cg05032848	0.0181007	0.801699
cg20082272	0.952494	0.233522
cg04465078	0.0356846	0.853783
cg25408314	0.0305219	0.811336
cg01553231	0.957709	0.161084
cg17518776	0.9123	0.205947
ch.1.227329902F	0.0223467	0.795119
cg02331303	0.0451657	0.8483
cg03611487	0.952784	0.0782084
cg09837656	0.0277687	0.83344
cg24843443	0.012422	0.800969
cg06193328	0.932588	0.178336
cg24364668	0.0329138	0.790712
cg21374048	0.0242583	0.805448
cg24867247	0.0400174	0.835642
cg05902130	0.0675488	0.844056
ch.10.83445482F	0.0408114	0.861805
cg21382890	0.0383557	0.828521
cg02760280	0.938608	0.111095
cg11068784	0.968962	0.224385
cg05699921	0.0273168	0.737549
ch.19.33613505F	0.0298557	0.854419
cg00164641	0.965118	0.169848
cg26618903	0.0267692	0.783382
ch.4.125556998F	0.0341813	0.801469
cg13870520	0.0448856	0.761458
cg18832140	0.0660828	0.859033
cg21205978	0.0203346	0.847622
cg07153588	0.0257767	0.825692
cg11205552	0.0200901	0.774901
cg23039189	0.0183697	0.795283
cg00795927	0.958526	0.145646
cg13966448	0.04734	0.772903
cg07233230	0.885233	0.175204
cg05037389	0.0204296	0.832249
cg01523712	0.951414	0.142585
cg18215449	0.0206627	0.796274
cg10652650	0.0143307	0.774762
cg15622619	0.972227	0.253297
cg18567041	0.854448	0.133947
cg05194636	0.973102	0.261921
ch.10.132220714F	0.043829	0.826835
cg05406923	0.0872931	0.88518
cg00430036	0.0592589	0.835209
ch.3.2787532R	0.0676359	0.807883
cg13496662	0.0957006	0.822511
cg21529164	0.82293	0.118881
cg07530172	0.959657	0.202848
ch.1.207470500F	0.121343	0.848667
cg06960794	0.0266601	0.816187
cg04605980	0.85881	0.0535508
cg01020263	0.0343367	0.755345
cg27621721	0.0695477	0.91394
cg22688815	0.951569	0.172275
cg05315321	0.0170778	0.825492
cg03773862	0.932409	0.19228
cg16976499	0.073263	0.818436
cg01462184	0.958055	0.192222
cg15120161	0.932641	0.209206
cg17445840	0.0444081	0.834184
cg03370270	0.0292501	0.783124
cg08144586	0.0632997	0.852267
cg07931714	0.0261931	0.767928
cg09392827	0.869735	0.150562
cg23008718	0.069862	0.873033
cg00347775	0.900018	0.160832
cg04571522	0.97165	0.24631
cg19477689	0.951181	0.202958
ch.4.112386156R	0.0285078	0.795786
cg24617171	0.0466212	0.810591
cg23836737	0.130482	0.906994
cg03364683	0.0294065	0.809839
cg01454752	0.91138	0.0710441
cg03264729	0.934716	0.158192
cg05230834	0.862693	0.14439
cg05402634	0.957199	0.176579
cg11423206	0.100758	0.880233
cg11633770	0.128817	0.905001
cg25656762	0.0533478	0.830659
ch.18.546433R	0.00854426	0.786073
cg16699540	0.0309398	0.832897
cg26165081	0.0981032	0.88675
cg24445388	0.95407	0.168636
cg09998451	0.915504	0.124407
cg22155376	0.946521	0.150966
ch.10.622552R	0.103751	0.835372
cg20358011	0.926813	0.115838
cg20584157	0.945481	0.199805
cg10623530	0.953621	0.149133
cg06413196	0.961174	0.220827
cg24243753	0.0653272	0.861676
cg00729699	0.904155	0.174589
ch.9.10784434R	0.0528673	0.774312
ch.8.65240324F	0.0242583	0.827962
cg13300939	0.0789335	0.878527
cg12536279	0.0462486	0.779639
cg01712737	0.906932	0.120657
ch.15.95956591R	0.0325342	0.812708
cg26190686	0.847882	0.13379
cg13940444	0.0793062	0.817744
cg26101086	0.953368	0.173464
cg06581978	0.0701981	0.865815
ch.5.2558853F	0.0619989	0.799067
cg05970116	0.0602007	0.81059
cg12033075	0.923487	0.152867
cg00049382	0.03163	0.801024
cg26322739	0.032407	0.764701
cg02490942	0.965446	0.260257
cg01307776	0.9654	0.247729
cg25291653	0.0195796	0.773841
cg26131026	0.0947992	0.886787
cg18527583	0.0615378	0.882611
ch.20.23481851F	0.0620283	0.807563
ch.7.3102217F	0.0960193	0.819327
cg02029841	0.11498	0.906894
cg23575320	0.00984361	0.770239
ch.6.30895157R	0.0588066	0.766704
ch.12.1107853R	0.0676328	0.842868
cg11854981	0.178246	0.88616
cg07858973	0.0449169	0.761534
cg04131468	0.887014	0.122261
cg24396429	0.960099	0.240077
cg09565806	0.0462379	0.777034
cg15322932	0.0687245	0.82789
cg27062571	0.0830077	0.801489
cg20918393	0.0292034	0.803315
cg20659057	0.917889	0.187604
cg21136544	0.926538	0.226047
cg06498520	0.0676315	0.802289
cg17264541	0.934677	0.186018
cg18957751	0.0167472	0.798139
cg13601517	0.050064	0.817409
cg00577865	0.051645	0.75579
cg11225090	0.0929074	0.890177
cg22437153	0.0376693	0.832805
cg08076018	0.0328134	0.735999
cg15006396	0.0172481	0.736571
cg27205902	0.949451	0.166043
cg05810428	0.108377	0.865269
cg20594304	0.0481472	0.787717
cg18852618	0.0407368	0.828883
cg18874294	0.0414203	0.805356
cg09457766	0.0998264	0.858145
cg05755354	0.929012	0.165388
cg01195276	0.0466013	0.755913
cg24182521	0.101758	0.840473
cg07055259	0.957276	0.238282
cg08781257	0.975158	0.257044
cg16555388	0.121979	0.86434
cg12113356	0.0121284	0.75074
cg03967798	0.0945469	0.866617
cg13287247	0.0293793	0.798525
cg00414166	0.0699	0.831189
cg18913890	0.0147621	0.785268
cg26606551	0.942332	0.223324
cg00755063	0.0660202	0.77746
cg15318861	0.0233388	0.730349
cg27570256	0.0496992	0.802381
cg04564000	0.0460347	0.830599
ch.5.91394379F	0.0393908	0.79091
ch.17.49865880R	0.026331	0.756876
cg17002851	0.823316	0.0730467
cg20483374	0.0725478	0.827748
ch.17.53379803R	0.0208777	0.771549
cg10114877	0.921543	0.181024
ch.1.194862R	0.0651791	0.785952
ch.13.1320446R	0.0269427	0.840156
ch.12.17725596F	0.0664367	0.90803
cg08129759	0.0820865	0.782491
cg22086566	0.862278	0.122574
cg02905245	0.0826007	0.783682
ch.3.97157383F	0.0829262	0.894082
cg07592809	0.959242	0.232526
cg07161429	0.124186	0.849608
cg22686523	0.950405	0.123647
cg06767314	0.90478	0.190997
ch.5.3135990F	0.0594957	0.803163
cg03574119	0.0320868	0.750665
cg11911305	0.0984611	0.897357
cg07191834	0.0550255	0.874514
cg10974980	0.0439361	0.748687
cg16055914	0.903846	0.184306
cg17886420	0.0496746	0.815086
cg11468635	0.962351	0.239924
cg26597727	0.0440949	0.815723
cg01228136	0.0204087	0.774971
cg00257893	0.122675	0.831836
cg04404310	0.960329	0.224023
ch.3.1736055R	0.0548014	0.837954
cg27598956	0.893862	0.109823
cg17200441	0.0781002	0.820515
cg01128736	0.0408164	0.855367
cg15426660	0.0510803	0.793391
cg25491558	0.0224244	0.775929
cg12793610	0.0639482	0.80074
cg06744481	0.940633	0.24058
cg17127235	0.861081	0.158298
cg01243879	0.063695	0.810747
cg14438213	0.0639876	0.789951
cg23820816	0.0347881	0.802664
cg14527262	0.944075	0.239909
cg25423573	0.0271333	0.750402
cg17966560	0.0608265	0.825189
cg22837714	0.0638485	0.780995
cg04784316	0.0547542	0.841162
cg01990593	0.0472741	0.830471
cg20040765	0.0623834	0.835229
cg07023459	0.0403463	0.823111
cg20217872	0.0803354	0.796564
cg01928078	0.0889173	0.813293
ch.11.2619180F	0.061863	0.795224
cg04057956	0.099089	0.887264
ch.2.126989343R	0.0697129	0.774016
cg23705155	0.948939	0.190385
cg02591564	0.948752	0.233341
ch.6.1189514F	0.0196215	0.744021
cg00480381	0.913057	0.139581
cg18890892	0.152182	0.879743
cg02397720	0.0853219	0.921099
cg05884870	0.0466199	0.758603
cg08906015	0.0468069	0.784018
cg17974684	0.0399499	0.795178
cg22180580	0.0682841	0.780116
cg24232510	0.958157	0.248066
cg15945287	0.0558825	0.787739
cg16553500	0.0824455	0.810062
cg24790356	0.139265	0.84633
cg04228083	0.91841	0.172719
cg07799277	0.0271053	0.737716
cg00702126	0.0551446	0.778944
cg06452558	0.825965	0.119854
cg13056990	0.91773	0.171408
cg12852139	0.963018	0.228328
ch.4.27504789F	0.0977802	0.828803
cg13475995	0.125589	0.873833
cg15300753	0.0985333	0.850832
cg24210523	0.109065	0.842866
cg03516335	0.0461712	0.860486
cg27028281	0.858825	0.0933339
cg18635361	0.965169	0.235681
cg04821520	0.159618	0.875915
ch.2.1365132F	0.159812	0.875276
cg16286735	0.0950927	0.89866
cg20379170	0.888127	0.166356
ch.4.3207570F	0.0422499	0.804615
cg23477967	0.0288937	0.788299
cg10787000	0.979826	0.269763
cg05651243	0.83613	0.121722
cg11555420	0.954368	0.193517
cg18105749	0.0462364	0.758122
cg14627089	0.0838485	0.836417
cg14180029	0.937657	0.215534
cg10354730	0.900252	0.14118
cg17084937	0.879805	0.108974
cg14669524	0.909209	0.113261
cg22752023	0.0641761	0.831348
cg26380291	0.05279	0.82706
ch.10.1020819F	0.0914241	0.862909
cg17110586	0.0534245	0.854331
cg25436634	0.0859616	0.895556
cg17284609	0.0968893	0.8678
cg05766064	0.064899	0.819322
cg27627006	0.11781	0.825663
cg19118904	0.89169	0.177741
cg03971555	0.871237	0.0977925
cg23028740	0.944	0.194427
cg06357561	0.0907595	0.855749
cg20229025	0.957373	0.246099
ch.21.25580530F	0.0982215	0.893404
cg03781098	0.0764585	0.841877
cg00619561	0.904037	0.186089
cg07376086	0.113183	0.841606
cg03063309	0.0738034	0.837725
ch.5.627424R	0.0507057	0.805699
ch.9.76081330F	0.0881015	0.863607
cg22471112	0.0417262	0.800867
cg09327586	0.0832276	0.899626
cg06736312	0.920559	0.200991
cg20459687	0.0346514	0.817827
ch.5.357603F	0.0415289	0.802259
ch.5.28120096R	0.0295554	0.799411
cg05928581	0.0674268	0.822665
cg06930722	0.0504754	0.75275
cg25705452	0.966928	0.265979
cg04180929	0.0472387	0.789942
cg09750084	0.108524	0.888168
cg00808305	0.0399277	0.813113
cg19951297	0.905019	0.201645
ch.12.1274494R	0.0402051	0.852951
cg20740903	0.0785499	0.826122
ch.15.429642R	0.0333849	0.765987
cg25890168	0.0893335	0.874677
ch.4.125594887R	0.13945	0.85345
cg23373640	0.0361026	0.770974
cg05641529	0.150976	0.890469
ch.4.178543248R	0.125981	0.833868
cg00491412	0.916834	0.214787
cg06137072	0.0866702	0.798843
cg00211115	0.0520597	0.775615
cg18019132	0.0300661	0.733445
cg04202620	0.0597966	0.793605
cg15221739	0.132483	0.852301
cg22119466	0.0707539	0.805224
cg05322837	0.0490329	0.834374
cg04843461	0.873557	0.14152
cg06243458	0.115625	0.839493
cg26104932	0.0196796	0.798702
ch.11.87583764F	0.103174	0.826925
cg06240690	0.0700806	0.772681
cg07962143	0.081746	0.830349
cg25308354	0.960277	0.224497
cg21205392	0.846112	0.114471
cg01963754	0.941117	0.209386
ch.8.1702176R	0.0509943	0.796407
cg16281600	0.924945	0.138452
cg02142896	0.0743207	0.858908
ch.16.486323F	0.113298	0.824582
cg15656501	0.0457041	0.77584
cg16182685	0.89945	0.177528
cg09750775	0.0385712	0.751318
cg07136035	0.964326	0.249236
cg24093182	0.971114	0.26837
cg27308218	0.945103	0.192449
cg24860812	0.953403	0.252913
ch.4.146002696F	0.0254557	0.736583
ch.6.67663644F	0.0322187	0.785216
cg18961101	0.923576	0.214737
cg07152925	0.0886574	0.893411
ch.15.93744710R	0.0777485	0.881206
cg22094781	0.906917	0.167051
ch.16.1427106R	0.0824199	0.830992
cg22000727	0.0834251	0.79353
cg10495572	0.130956	0.86625
cg21841632	0.0730071	0.773147
cg02940165	0.0676949	0.779321
cg18946473	0.0314758	0.761755
cg15408237	0.0651064	0.795804
ch.21.35952245R	0.0264424	0.751188
ch.3.741789F	0.109586	0.878242
cg02179341	0.938435	0.171679
ch.20.378824F	0.191842	0.926423
cg19763108	0.877435	0.098229
ch.8.54249749F	0.0522053	0.797789
cg02985540	0.0647576	0.846208
cg11987645	0.0593244	0.80066
cg00025591	0.103407	0.863746
cg03779374	0.00999516	0.745282
cg13814351	0.967161	0.25765
cg12564012	0.91205	0.123497
cg06047587	0.0618781	0.813661
cg01115432	0.931637	0.224501
cg27019731	0.965811	0.238276
cg03302448	0.929077	0.163553
cg22786748	0.140591	0.904699
cg02104952	0.0598825	0.771881
cg04179740	0.113743	0.884555
cg27623406	0.921555	0.205777
cg02077216	0.952844	0.188048
cg04362790	0.940768	0.232429
cg16528895	0.022997	0.810861
cg24217948	0.906904	0.167453
cg26456997	0.0379183	0.754657
cg21474062	0.0372818	0.747274
cg25272757	0.1071	0.812799
cg01855735	0.0194812	0.720405
cg14019757	0.0529132	0.78839
cg10553890	0.124271	0.895241
ch.18.1233013F	0.0692759	0.800834
cg04079139	0.0417752	0.760596
cg07526904	0.1053	0.831492
cg07781645	0.139832	0.894932
cg19860734	0.079353	0.876385
cg14552732	0.937503	0.192724
cg11748187	0.060771	0.763038
cg00677574	0.0385709	0.776367
cg06153623	0.154931	0.861955
cg06454084	0.0703204	0.779282
cg18233538	0.929523	0.186187
cg13495118	0.0764766	0.799756
cg06795960	0.926468	0.181702
cg24587185	0.892205	0.153135
cg02955343	0.853447	0.124747
cg12608692	0.0540848	0.899027
ch.13.54449778R	0.03577	0.750604
cg08256406	0.965929	0.259473
cg14345676	0.960596	0.134092
cg21551979	0.971416	0.26541
cg17369406	0.130137	0.844476
cg08837481	0.921705	0.204516
cg10760299	0.0230427	0.808111
ch.6.1841262F	0.0720493	0.809179
cg18454133	0.127782	0.872673
cg01736164	0.891181	0.124772
cg18330041	0.862165	0.116458
cg06574960	0.0989548	0.827307
cg01242976	0.0797514	0.810016
cg15096829	0.0969356	0.808078
cg04113348	0.848249	0.126646
cg18334392	0.125673	0.924602
cg23320499	0.103439	0.854456
cg14190522	0.0933256	0.819422
ch.2.1730502R	0.0969589	0.841556
cg04786592	0.129217	0.850089
ch.8.84603638R	0.0895236	0.859982
cg04799270	0.963331	0.261051
cg08454015	0.899703	0.159788
cg24727480	0.0204063	0.731983
cg05491166	0.965683	0.265177
cg25451660	0.909293	0.198851
cg01562813	0.919584	0.125919
cg20237547	0.0620356	0.820519
cg05003723	0.920323	0.216564
cg02554051	0.911034	0.189114
cg18052274	0.873099	0.126894
cg10185478	0.124955	0.825065
cg06106484	0.150071	0.852571
ch.1.1391820F	0.166761	0.884002
cg04658601	0.946661	0.196445
cg17943672	0.943488	0.137156
cg08220149	0.0361406	0.846255
ch.17.4249285F	0.0772535	0.795586
cg06183849	0.0764156	0.779324
cg25670583	0.903847	0.186765
cg11654900	0.117554	0.853867
cg26504529	0.934476	0.217754
cg17450733	0.104849	0.840923
cg04860674	0.814184	0.069674
cg01987925	0.0846422	0.848307
cg07197585	0.905908	0.188827
ch.12.1171804F	0.0218159	0.738284
cg13029400	0.0360317	0.750297
cg04407215	0.046987	0.765515
cg15859311	0.878634	0.0881285
cg21610839	0.0784612	0.821259
ch.7.1140112F	0.0186182	0.741887
cg25821783	0.10053	0.867248
ch.4.2941683R	0.0572457	0.784861
cg16547579	0.111995	0.872666
cg18605987	0.0972868	0.818659
ch.11.29638519R	0.117288	0.832242
cg04254886	0.12819	0.904179
cg26271591	0.0668708	0.807563
ch.5.28714848R	0.0400238	0.76154
cg02677609	0.0913514	0.886122
cg16264966	0.0564291	0.771126
cg07356745	0.065933	0.820621
cg12764201	0.85649	0.140732
cg13631318	0.102473	0.830665
cg26154047	0.918911	0.186609
cg03770703	0.841944	0.126865
cg06968674	0.975656	0.239693
cg16895672	0.105878	0.879446
cg18880897	0.0376822	0.801162
cg09781650	0.113128	0.85945
cg18617860	0.830955	0.0775601
cg19807286	0.941373	0.222822
cg03377980	0.131569	0.853553
cg03090940	0.0806445	0.826419
cg22763593	0.171507	0.910657
cg09000385	0.131708	0.878082
cg11565512	0.0630684	0.796219
cg05053979	0.167353	0.879055
cg16238149	0.0672723	0.768493
cg17298925	0.901816	0.171899
cg09564361	0.196127	0.914068
cg18242139	0.906827	0.111907
cg06683719	0.126464	0.856933
cg20497704	0.836977	0.135049
cg16614527	0.105325	0.882646
ch.5.3000938F	0.0886861	0.831943
cg20287074	0.075042	0.783377
cg02204442	0.114301	0.865743
cg08750440	0.0379913	0.794844
cg15930703	0.0752756	0.805688
cg25135555	0.897169	0.183216
cg09436502	0.0491732	0.805842
cg00020474	0.129799	0.879203
cg02239453	0.894203	0.180682
cg05330668	0.0288199	0.762894
cg07285237	0.881363	0.155076
cg12439977	0.0955555	0.887864
cg17852588	0.142005	0.879508
cg27605358	0.920342	0.170784
cg26603050	0.0728576	0.804504
cg15850851	0.0360236	0.764398
cg15157312	0.160643	0.883062
cg21297493	0.0469864	0.773344
cg10706438	0.928326	0.227061
cg03099144	0.152655	0.932199
cg17176609	0.123533	0.858174
ch.4.2608081R	0.0143714	0.723773
cg11081251	0.12249	0.874533
cg24382686	0.119167	0.830071
cg03894990	0.825829	0.101787
cg06572713	0.0488549	0.76175
cg16862319	0.962425	0.197974
cg01557792	0.0980003	0.847408
cg01898377	0.0884858	0.79575
cg16814786	0.182758	0.928541
cg15398152	0.16126	0.868909
cg11763830	0.0393099	0.772288
cg05575639	0.121226	0.844577
cg02848961	0.0960286	0.871131
ch.4.86567531R	0.0275809	0.729182
cg06939852	0.851463	0.135641
cg01358444	0.155201	0.916396
cg17219660	0.068899	0.810357
cg27405988	0.0460043	0.793631
cg15656257	0.894856	0.174492
cg12232222	0.893566	0.180349
cg26814635	0.916072	0.204892
cg20144530	0.873418	0.171075
cg07012460	0.101759	0.80583
cg15384108	0.129789	0.832824
cg01627483	0.0905658	0.802217
ch.9.84051654F	0.118689	0.859854
cg26518660	0.108803	0.870594
cg11093142	0.906241	0.145684
cg00113096	0.0987617	0.861748
cg20654468	0.0801249	0.820628
cg17684207	0.046826	0.811385
cg21598117	0.97159	0.243101
ch.5.762713R	0.139429	0.861007
cg06098215	0.114859	0.875869
cg11235594	0.943993	0.142139
cg23044178	0.931786	0.225401
cg13514049	0.060917	0.8292
cg02184010	0.0730678	0.789242
cg01517740	0.879675	0.139703
ch.6.1206704R	0.0379603	0.777893
cg13824815	0.888212	0.17415
cg20510474	0.088095	0.837929
ch.2.2729437F	0.0401621	0.795371
cg10204320	0.105497	0.829459
cg20438687	0.103206	0.853754
cg25688583	0.0843758	0.789231
cg18890556	0.112902	0.892712
cg26076793	0.876166	0.0972272
cg16464373	0.870941	0.121747
cg17469276	0.888633	0.17185
cg01347048	0.169853	0.89289
cg01166876	0.138766	0.915518
cg13276570	0.954304	0.243338
cg14178083	0.923287	0.217256
cg01309726	0.12623	0.847664
cg01923516	0.956328	0.164084
cg25614364	0.13857	0.925999
cg02588889	0.100606	0.81056
cg24166450	0.0922182	0.823599
cg26315984	0.178106	0.89665
cg06377226	0.126297	0.889701
cg00327697	0.058806	0.781012
cg26227005	0.872804	0.136966
cg02226645	0.856797	0.0647534
cg21514164	0.182174	0.889769
cg11902543	0.148945	0.893662
cg24375409	0.0996609	0.820205
cg24312105	0.923977	0.212048
ch.3.382096F	0.141269	0.854966
cg01446620	0.131292	0.921298
cg06887224	0.879176	0.15653
cg18313416	0.863456	0.106203
cg19432362	0.781743	0.0769858
cg19595295	0.162604	0.899332
cg10659480	0.961682	0.25551
cg24365837	0.889606	0.189142
cg20047489	0.879999	0.134663
cg05276155	0.200783	0.910106
cg08538032	0.883816	0.149746
cg04104463	0.839589	0.0600871
ch.21.27853252F	0.16297	0.901142
cg13767001	0.127311	0.890649
ch.14.40801112R	0.0604722	0.932334
cg10606240	0.0969295	0.801684
cg19702675	0.105098	0.810118
ch.8.870369R	0.101239	0.824394
cg02688118	0.144203	0.847934
cg26915994	0.888807	0.179275
cg05607053	0.171497	0.886395
ch.12.59779038F	0.0361148	0.743218
cg11599505	0.956147	0.174827
cg11979420	0.179311	0.920579
cg22809856	0.114105	0.836636
cg01112778	0.140016	0.891651
cg00741695	0.0859151	0.856203
cg14284211	0.0727852	0.795762
cg15813460	0.906231	0.202464
cg07301044	0.863025	0.151478
cg03998264	0.101941	0.822947
cg26915329	0.140918	0.873416
cg27088726	0.15948	0.866506
cg22890130	0.125613	0.851606
cg03023465	0.135635	0.863612
cg06388363	0.134211	0.885655
cg16530086	0.839246	0.134338
cg21132686	0.15043	0.874573
ch.5.97862610R	0.181006	0.885743
cg01975505	0.0988037	0.870912
cg00567922	0.935395	0.194822
cg08106706	0.821822	0.0979875
cg00187692	0.184409	0.902109
cg05474726	0.855121	0.109671
cg09363841	0.871371	0.143046
cg11950778	0.160145	0.885472
cg02000275	0.129644	0.879577
cg13781158	0.859795	0.152779
cg04502814	0.124163	0.867773
cg03420978	0.138373	0.88225
cg17966192	0.111026	0.831818
cg12754495	0.187892	0.895153
cg02069524	0.105285	0.853208
cg08104146	0.845626	0.141531
cg17526103	0.844082	0.139398
ch.13.53330881F	0.118759	0.848143
cg08393822	0.128014	0.845061
cg05267204	0.0675852	0.822359
cg01031983	0.131765	0.839323
ch.14.83549112R	0.147781	0.854823
cg13623749	0.136587	0.837961
cg08162976	0.148302	0.911717
cg03952520	0.133921	0.856869
cg15485247	0.887646	0.184926
cg21211480	0.142636	0.851775
cg05033239	0.1127	0.836101
cg09442403	0.176187	0.918522
cg26691179	0.0503812	0.80792
cg07166896	0.125191	0.85096
cg13016916	0.159697	0.882074
cg18184053	0.141767	0.894835
cg10236596	0.188261	0.897609
cg10956848	0.933759	0.233197
cg18574274	0.182935	0.923127
cg01320433	0.135469	0.869697
cg10470891	0.0707928	0.83345
cg17656763	0.191433	0.926447
cg01797450	0.139575	0.85689
cg24776343	0.172043	0.880698
ch.6.122375039R	0.15485	0.864391
cg03875819	0.862069	0.157696
cg17890233	0.18525	0.893951
cg16985778	0.139252	0.86294
cg01301282	0.173145	0.892768
cg05160558	0.0704068	0.79149
cg10583651	0.187218	0.898726
cg19192065	0.162976	0.880125
cg27106950	0.167648	0.869696
cg26157756	0.0701243	0.818963
cg14802771	0.179099	0.904362
cg17876645	0.151978	0.870838
cg26732544	0.197134	0.899307
cg00698413	0.151538	0.88482
cg18376288	0.210147	0.941324
cg15857470	0.198845	0.905071
cg10114725	0.153737	0.894352
cg03224396	0.197363	0.907579
cg02515422	0.138963	0.88051
cg08165796	0.165663	0.86797
cg16434331	0.142304	0.875949
cg03315344	0.160269	0.879489
cg11620135	0.946839	0.24111
cg03505817	0.185124	0.890306
cg14529406	0.0498082	0.869253
cg02284297	0.200935	0.914166
cg21992400	0.222701	0.929799
cg02273889	0.194678	0.909263
cg22777467	0.161182	0.867772
cg00460983	0.0727454	0.869087
cg19268119	0.183217	0.902498
cg00638797	0.932769	0.210402
