# Supplementary material for: Cell and tissue type independent age-associated DNA methylation changes are not rare but common
Source: Aging (Albany NY). 2018 Nov 27;10(11):3541–57. doi: 10.18632/aging.101666 (PMC6286821; doi:10.18632/aging.101666)
Supplement: Supplementary Table S2 [file aging-10-101666-s002.xlsx]

## Sheet: HorvathClockRankedPanTissue.txt
CpG	Mono(t)	Mono(P)	CD4T(t)	CD4T(P)	Neu(t)	Neu(P)	B(t)	B(P)	CD8(t)	CD8(P)	BUC(t)	BUC(P)	CVX(t)	P(CVX)	FIB(t)	FIB(P)	Brain(t)	Brain(P)	LIV(t)	LIV(P)
cg02479575	4.61	5e-06	7.87	4e-13	2.85	0.005	3.92	0.0002	9.1	3e-13	3.88	0.0002	4.25	5e-05	4.82	2e-06	14.09	3e-33	8.26	6e-14
cg04084157	12.34	8e-33	5	1e-06	7.78	7e-13	7.62	3e-10	7.19	8e-10	6.62	2e-09	7.23	1e-10	8.35	9e-16	23.51	4e-64	4.7	6e-06
cg04528819	9.92	3e-22	5.04	1e-06	5.93	2e-08	2.49	0.016	10.2	4e-15	2.67	0.009	5.59	2e-07	5.65	3e-08	20.84	1e-55	9.35	8e-17
cg10523019	10.66	3e-25	2.18	0.031	6.43	1e-09	5.14	3e-06	6.18	5e-08	3.96	0.0001	5.09	2e-06	8.42	6e-16	7.32	4e-12	5	2e-06
cg12373771	10.51	1e-24	3.17	0.002	5.02	1e-06	8.22	3e-11	10.33	2e-15	5.54	2e-07	4.81	5e-06	6.17	2e-09	26.18	4e-72	6.85	2e-10
cg18573383	8.03	2e-15	3.67	0.0003	3.95	0.0001	6.45	2e-08	9.27	2e-13	3.9	0.0002	5.61	2e-07	2.65	0.008	12.22	5e-27	8.72	4e-15
cg20692569	6.59	7e-11	3.77	0.0002	3.69	0.0003	5.74	4e-07	7.81	6e-11	4.8	5e-06	4.33	4e-05	2.09	0.038	24.28	2e-66	3.88	0.0002
cg22736354	17.36	1e-59	5.37	3e-07	9.2	2e-16	10.43	6e-15	13.37	2e-20	3.97	0.0001	6.74	1e-09	5.38	1e-07	37.48	5e-102	9.76	7e-18
cg25148589	11.76	4e-30	3.32	0.001	5.62	8e-08	4.01	0.0002	11.3	6e-17	7.38	5e-11	8.18	9e-13	7.53	3e-13	4.33	2e-05	8.3	5e-14
cg05250458	3.4	0.0007	2.66	0.009	2.25	0.026	3.62	0.0006	5.21	2e-06	3.9	0.0002	4.61	1e-05	0.45	0.652	11.08	3e-23	4.2	4e-05
cg06493994	16.95	3e-57	4.44	2e-05	10.18	3e-19	5.95	2e-07	12.14	2e-18	5.78	8e-08	10.63	4e-18	6.15	2e-09	23.63	2e-64	NA	0
cg17729667	9.62	4e-21	2.17	0.031	3.94	0.0001	5.61	6e-07	10.12	6e-15	1.84	0.069	2.16	0.033	2.37	0.019	20.02	5e-53	4.15	5e-05
cg21870884	10.51	1e-24	1.74	0.083	6.02	1e-08	8.38	1e-11	8.65	2e-12	4.09	9e-05	3.35	0.001	2.38	0.018	11.47	1e-24	5.02	1e-06
cg22809047	7.24	9e-13	2.72	0.007	4.41	2e-05	6.33	4e-08	7.44	3e-10	5.47	3e-07	5.86	6e-08	5.53	6e-08	19.72	5e-52	0.8	0.423
cg23517605	5.5	5e-08	1.84	0.067	3.53	0.0005	5.11	4e-06	8.38	6e-12	2.92	0.004	2.25	0.026	2.31	0.021	9.96	9e-20	3	0.003
cg25771195	3.96	8e-05	3	0.003	2.12	0.036	0.79	0.433	2.73	0.008	3.49	0.0007	3.3	0.001	3.1	0.002	15.99	1e-39	4.14	6e-05
cg26005082	5.36	1e-07	5.42	2e-07	1.45	0.148	4.24	8e-05	11.36	4e-17	3.39	0.001	3.82	0.0002	3.97	9e-05	13.42	5e-31	10.25	3e-19
cg03019000	-6.44	2e-10	-0.13	0.897	-2.9	0.004	-2.81	0.007	2.5	0.015	-2.21	0.03	-4.02	0.0001	2.98	0.003	-8.18	2e-14	-2.39	0.018
cg05442902	-9.12	4e-19	-4.35	2e-05	-5.7	5e-08	-3.81	0.0003	-2.23	0.029	-2.4	0.018	-3.96	0.0001	-2.2	0.028	0.02	0.981	3.1	0.002
cg07158339	-9.99	2e-22	-3.81	0.0002	-6.7	3e-10	-6.95	4e-09	-4.08	0.0001	-3.89	0.0002	-4.76	6e-06	2.95	0.003	-4.65	5e-06	0.66	0.511
cg08331960	-6.77	2e-11	-3.51	0.0006	-5.37	3e-07	-3.06	0.003	2.87	0.006	-2.53	0.013	-3.58	0.0005	-3.6	0.0004	-14.5	1e-34	-0.37	0.713
cg11299964	-6.33	4e-10	-4.46	1e-05	-4.18	5e-05	-5.4	1e-06	-8.2	1e-11	-2.23	0.028	-3.32	0.001	-2.76	0.006	-3.74	0.0002	NA	0
cg19722847	-8.15	1e-15	-6.76	2e-10	-5.36	3e-07	-6.81	6e-09	-5.14	3e-06	-2.66	0.009	-3.4	0.001	-4.69	4e-06	-12.54	5e-28	-1.27	0.207
cg24058132	-11.58	3e-29	-2	0.047	-3.52	0.0006	-4.58	2e-05	-3.99	0.0002	-1.9	0.06	-2.59	0.011	-4.51	9e-06	-9.05	5e-17	-4.65	7e-06
cg25564800	-6.13	1e-09	-2.27	0.025	-2.8	0.006	-4.65	2e-05	-6.18	5e-08	-2.44	0.016	-1.06	0.291	-2.27	0.024	-6.92	4e-11	-3.27	0.001
cg01353448	2.42	0.015	0.86	0.393	2.77	0.006	5.61	6e-07	2.75	0.008	3.7	0.0004	2.19	0.031	2.64	0.009	3.95	0.0001	NA	0
cg01968178	6.34	3e-10	2.82	0.005	3.27	0.001	4.32	6e-05	8.24	1e-11	1.11	0.271	2.54	0.013	-0.93	0.355	16.84	2e-42	3.8	0.0002
cg02331561	3.07	0.002	0.92	0.36	2.1	0.037	1.66	0.103	2.85	0.006	3.19	0.002	3.06	0.003	3.8	0.0002	15.47	7e-38	6.53	9e-10
cg02388150	5.86	6e-09	2.06	0.041	2.63	0.009	3.33	0.002	8.3	9e-12	0.37	0.71	1.52	0.132	-4.48	1e-05	15.64	2e-38	2.69	0.008
cg02654291	4.73	3e-06	4.17	5e-05	4.09	7e-05	3.07	0.003	6.75	5e-09	NA	0	NA	0	-3.05	0.002	6.27	2e-09	5.88	2e-08
cg05675373	8	3e-15	2.81	0.006	6.11	7e-09	2.87	0.006	4.02	0.0002	0.55	0.587	2.09	0.039	1.69	0.092	24.09	7e-66	5.42	2e-07
cg08370996	6.96	6e-12	4.21	4e-05	5.44	2e-07	3.38	0.001	10.7	6e-16	1.21	0.229	2.62	0.01	-0.58	0.562	22.97	2e-62	3.12	0.002
cg10281002	3.83	0.0001	2.17	0.032	3.11	0.002	3.28	0.002	9.66	3e-14	3.15	0.002	5.41	4e-07	-1.06	0.291	12.73	1e-28	NA	0
cg12946225	3.97	8e-05	1.48	0.14	4.03	9e-05	4.03	0.0002	7.75	8e-11	5.18	1e-06	3.97	0.0001	1.41	0.159	18.42	1e-47	5.27	5e-07
cg13460409	4.2	3e-05	1.17	0.243	-0.28	0.778	5.02	5e-06	7.54	2e-10	3.42	0.0009	2.69	0.008	7.87	3e-14	13.01	1e-29	3.32	0.001
cg13836627	9.01	9e-19	5.49	1e-07	4.13	6e-05	2.95	0.005	1.65	0.104	2.14	0.035	3.51	0.0007	-2.48	0.013	0.07	0.943	3.55	0.0005
cg16547529	4.56	6e-06	2.85	0.005	1.55	0.124	5.11	4e-06	8.29	9e-12	2.71	0.008	1.85	0.068	5.97	5e-09	8.88	2e-16	5.17	7e-07
cg19692710	-4.35	1e-05	-0.12	0.904	-2.04	0.043	-2.11	0.039	-5.24	2e-06	-1.06	0.292	2.1	0.039	3.47	0.0006	10.81	2e-22	2.28	0.024
cg19945840	7.01	4e-12	3.61	0.0004	3.62	0.0004	4.83	1e-05	7.75	8e-11	NA	0	NA	0	3.51	0.0005	11.88	7e-26	8.53	1e-14
cg20914508	5.81	8e-09	2.11	0.037	2.96	0.004	3.72	0.0005	8.09	2e-11	1.28	0.204	2.17	0.032	2.26	0.025	0.62	0.537	3.01	0.003
cg21801378	14.73	8e-45	6.37	2e-09	6.18	5e-09	7.4	6e-10	9.33	1e-13	NA	0	NA	0	2.79	0.006	10.3	8e-21	7.88	5e-13
cg26842024	10	1e-22	2.18	0.03	5.66	6e-08	1.93	0.059	2.55	0.013	4.9	4e-06	3.94	0.0001	0.27	0.79	10.58	1e-21	5.26	5e-07
cg00168942	-8.86	3e-18	-2.38	0.019	-4.71	5e-06	-7.18	1e-09	-5.63	4e-07	-0.7	0.483	-1.24	0.217	5.77	2e-08	-7.22	7e-12	-2.82	0.005
cg01511567	-8.36	2e-16	-3.38	0.0009	-3.44	0.0007	-5.14	3e-06	-3.83	0.0003	NA	0	NA	0	-4.34	2e-05	-12.58	3e-28	-7.23	2e-11
cg01820374	-14.1	2e-41	-3.62	0.0004	-7.78	8e-13	-6.6	1e-08	-8.41	5e-12	-4.34	3e-05	-4.8	5e-06	4.96	1e-06	1.58	0.116	-0.96	0.337
cg02071305	-6	3e-09	-1.07	0.284	-2.8	0.006	-4.14	0.0001	-3.48	0.0009	-1.08	0.284	-2.86	0.005	-2.66	0.008	-3.12	0.002	-2.5	0.013
cg04474832	-12.3	1e-32	-5.7	5e-08	-4.42	2e-05	-5.45	1e-06	-5.33	1e-06	-0.91	0.367	-4.88	4e-06	-2.62	0.009	-8.81	3e-16	NA	0
cg09809672	-17.75	5e-62	-2.7	0.008	-8.71	3e-15	-8.58	7e-12	-5.43	9e-07	-5.4	4e-07	-6.82	7e-10	0.08	0.936	-1.83	0.069	-3.41	0.0008
cg14175438	-9.25	1e-19	-3.83	0.0002	-5.64	7e-08	-5.77	3e-07	-8.78	1e-12	-2.29	0.024	-2.19	0.031	-1.45	0.149	-8.85	2e-16	-1.04	0.299
cg15804973	-15.38	2e-48	-4.2	4e-05	-5.7	5e-08	-7.39	6e-10	-7.5	2e-10	-3.04	0.003	-3.53	0.0006	-1.89	0.06	-5.19	5e-07	NA	0
cg16744741	-13.04	3e-36	-3.13	0.002	-6.38	2e-09	-4.45	4e-05	-1.52	0.134	-1.99	0.049	-2.48	0.015	3.11	0.002	-15.31	3e-37	-0.73	0.468
cg17324128	-5.26	2e-07	-5.08	1e-06	-3.3	0.001	-3.09	0.003	-3.7	0.0005	0.61	0.544	-1.82	0.072	-6.22	1e-09	-2.49	0.013	-2.84	0.005
cg17589341	-8.07	2e-15	-2.39	0.018	-2.67	0.008	-5.98	1e-07	-5.97	1e-07	-1.73	0.086	-2.67	0.009	2.09	0.038	-3.98	9e-05	-1.09	0.277
cg18328933	-11.62	2e-29	-0.85	0.396	-4.9	2e-06	-3.7	0.0005	3.33	0.001	-3.34	0.001	-3.48	0.0007	3.5	0.0005	-14.1	3e-33	0.95	0.342
cg23124451	-11.59	2e-29	-6.69	3e-10	-4.59	9e-06	-7.22	1e-09	-3.57	0.0007	-0.59	0.56	-2.97	0.004	-6.01	4e-09	-14.16	2e-33	-1.74	0.084
cg26614073	-13.24	3e-37	-4.6	8e-06	-4.94	2e-06	-6.49	2e-08	-2.89	0.005	NA	0	NA	0	-4.51	9e-06	-16	1e-39	-2.16	0.032
cg27015931	-2.82	0.005	-2.17	0.031	-6.28	3e-09	-6.95	4e-09	-4.75	1e-05	-0.52	0.605	-4.08	9e-05	-2.57	0.01	-9.22	2e-17	0.98	0.331
cg01644850	2.91	0.004	2.22	0.028	-0.65	0.52	3.12	0.003	6.58	1e-08	0.27	0.788	2.21	0.029	3.38	0.0008	22.85	5e-62	-0.54	0.592
cg03270204	-4.75	2e-06	-2.08	0.039	-3.53	0.0005	-1.69	0.097	2.8	0.007	-0.02	0.984	-3.13	0.002	4.49	1e-05	14.01	6e-33	NA	0
cg04836038	10.75	1e-25	4.33	3e-05	5.47	2e-07	2.07	0.043	3.75	0.0004	NA	0	NA	0	1.59	0.114	7.76	2e-13	3.11	0.002
cg05294243	3.39	0.0007	1.88	0.061	2.06	0.041	2.63	0.011	4.58	2e-05	1.3	0.196	0.24	0.809	-3.1	0.002	11.67	3e-25	3.26	0.001
cg06144905	-0.4	0.689	2.42	0.017	1.45	0.149	5.91	2e-07	5.86	2e-07	1.81	0.074	4.77	6e-06	8.48	4e-16	18.97	1e-49	4.93	2e-06
cg06361108	2.69	0.007	0.15	0.88	2.87	0.005	2.72	0.009	5.03	4e-06	1.97	0.052	1.88	0.062	4.05	6e-05	14.64	4e-35	3	0.003
cg09118625	-0.08	0.94	0.5	0.619	4.05	8e-05	3.07	0.003	5.42	9e-07	2.5	0.014	3.86	0.0002	5.73	2e-08	9.62	1e-18	-0.55	0.585
cg12351433	5.62	2e-08	2.57	0.011	1.46	0.147	4.21	9e-05	8.53	3e-12	0.76	0.452	2.18	0.031	0.31	0.759	12.91	3e-29	4.27	3e-05
cg13216057	3.56	0.0004	1.72	0.087	2.11	0.036	3.35	0.001	9.04	4e-13	-0.55	0.58	-0.39	0.698	3.53	0.0005	2.39	0.018	4.81	4e-06
cg13854874	2.46	0.014	2.16	0.032	-0.15	0.884	3.19	0.002	3.58	0.0007	2.91	0.004	0.05	0.958	3.11	0.002	12.1	1e-26	1.66	0.1
cg13899108	6.22	7e-10	0.97	0.334	2.79	0.006	2.75	0.008	6.76	5e-09	2.67	0.009	0.5	0.615	0.72	0.471	3.86	0.0001	2.59	0.01
cg16241714	1.69	0.091	2.54	0.012	-1.85	0.067	3.53	0.0008	6.93	2e-09	0.24	0.811	2.44	0.016	2.39	0.018	15.3	3e-37	3.01	0.003
cg17655614	6.24	6e-10	1.94	0.054	1.62	0.107	4.9	8e-06	8.33	8e-12	2.64	0.01	3.54	0.0006	2.9	0.004	25.31	1e-69	NA	0
cg20761322	2.51	0.012	1.1	0.273	3.32	0.001	1.58	0.12	4.48	3e-05	1.92	0.058	2.98	0.004	2.66	0.008	5.43	1e-07	3.32	0.001
cg22901840	0.53	0.598	0.65	0.515	4.07	7e-05	3.06	0.003	7.07	1e-09	2.63	0.01	3.1	0.002	0.27	0.787	9.57	1e-18	2.92	0.004
cg26845300	2.05	0.041	3.7	0.0003	0.98	0.331	2.16	0.035	6.96	2e-09	2.97	0.004	1.04	0.302	2.59	0.01	6.1	4e-09	NA	0
cg03330058	-6.88	1e-11	-0.83	0.406	-2.04	0.043	-1.58	0.121	3.21	0.002	-1.75	0.083	-2.04	0.044	2.4	0.017	10.5	2e-21	-3.85	0.0002
cg07408456	-14.78	4e-45	-1.95	0.053	-9.14	2e-16	-5.41	1e-06	0.98	0.33	-2.17	0.032	-4.48	2e-05	-0.44	0.658	-10.77	3e-22	2.04	0.043
cg10865119	-4.91	1e-06	0.07	0.947	-3.4	0.0008	-5.14	3e-06	-2.9	0.005	-0.55	0.584	-3.38	0.001	-6.03	4e-09	-10.25	1e-20	1.72	0.088
cg11314684	-7.9	7e-15	-2.46	0.015	-5.12	8e-07	-4.51	3e-05	-3.32	0.001	-1.37	0.175	-1.41	0.163	-8.42	6e-16	-5.46	1e-07	-0.09	0.926
cg12941369	-8.81	5e-18	-2.67	0.008	-4.56	1e-05	-2.56	0.013	-0.91	0.365	0.74	0.46	-1.39	0.169	-3.16	0.002	-3.05	0.003	-4.03	9e-05
cg13129046	-2.82	0.005	-2.21	0.029	-2.7	0.008	-1.27	0.21	0.75	0.454	-2.2	0.03	-2.44	0.016	-0.9	0.369	-8.15	2e-14	-1.99	0.048
cg13302154	-7.09	2e-12	-3.44	0.0007	NA	0	-6.04	1e-07	-3.02	0.004	-0.58	0.565	-3.05	0.003	-8.29	1e-15	-1.74	0.083	-5.22	6e-07
cg13547237	-9.95	2e-22	-0.4	0.687	-4.51	1e-05	-2.92	0.005	8.19	1e-11	-0.97	0.333	-2.34	0.021	-5.19	3e-07	-12.4	1e-27	-1.76	0.081
cg13931228	-6.04	2e-09	-2.97	0.003	-4.59	9e-06	-2.53	0.014	-4.51	3e-05	-0.44	0.66	-3.22	0.002	1.18	0.238	-5.06	8e-07	-0.04	0.965
cg16034652	-1.47	0.142	2.48	0.014	-2.26	0.025	-2.17	0.034	2.31	0.024	1.13	0.26	0.37	0.714	3.47	0.0006	9.6	1e-18	-2.12	0.036
cg17686885	-3.25	0.001	-1.25	0.214	-3.25	0.001	-1.21	0.233	4.24	7e-05	-2.61	0.01	-2.48	0.015	5.15	4e-07	5.51	9e-08	1.11	0.268
cg19724470	-7.55	9e-14	-2.07	0.04	-3.85	0.0002	-6.9	4e-09	-8.41	5e-12	NA	0	NA	0	-4.01	7e-05	-12.9	3e-29	-1.87	0.063
cg19761273	-12.79	6e-35	-6.5	9e-10	-6.95	8e-11	-3.79	0.0004	-5.19	2e-06	-1.29	0.201	-2.6	0.011	-0.22	0.83	-10.76	3e-22	-0.92	0.357
cg22197830	-10.39	4e-24	-1.43	0.153	-2.79	0.006	-6.2	6e-08	-5.43	9e-07	-2.36	0.02	-3.36	0.001	-1.83	0.069	-8.8	3e-16	-0.45	0.653
cg22947000	-14.1	1e-41	-3.49	0.0006	-8.08	1e-13	-4.57	3e-05	0.87	0.389	-1.27	0.207	-5.23	9e-07	-3.27	0.001	-8.69	6e-16	1.33	0.187
cg25809905	-13.12	1e-36	-4.16	5e-05	-7.19	2e-11	-4.12	0.0001	-0.61	0.545	-1.5	0.137	-2.82	0.006	8.95	1e-17	-2.37	0.018	1.78	0.076
cg02085507	1.16	0.245	0.65	0.514	1.82	0.071	1.11	0.27	4.73	1e-05	2.46	0.016	2.61	0.011	3.86	0.0001	5.76	3e-08	3.82	0.0002
cg02332492	-3.79	0.0002	-1.1	0.275	-1.86	0.065	-2.32	0.024	-2.39	0.02	-1.25	0.214	0.62	0.535	6.73	6e-11	7.6	7e-13	2.57	0.011
cg07337598	-2.95	0.003	2.7	0.008	-0.93	0.355	3.57	0.0007	1.03	0.307	0.08	0.936	0.05	0.959	3.39	0.0008	6.62	2e-10	2.55	0.012
cg08413469	3.09	0.002	1.83	0.068	-2.68	0.008	3.36	0.001	7.72	9e-11	NA	0	NA	0	2.38	0.018	-1.6	0.11	2.95	0.004
cg08965235	3.1	0.002	-0.89	0.372	-0.5	0.617	5.16	3e-06	6.48	1e-08	-0.44	0.664	0.92	0.361	-2.27	0.024	-10.95	7e-23	-3.55	0.0005
cg11932564	1.97	0.049	1.74	0.083	-0.71	0.476	1.15	0.256	6.66	7e-09	2.03	0.045	0.8	0.425	2.87	0.004	14.98	3e-36	5.18	7e-07
cg13975369	2.71	0.007	2.79	0.006	NA	0	2.19	0.032	5.12	3e-06	4.11	8e-05	1.79	0.077	1.03	0.303	12.49	7e-28	1.97	0.05
cg14658362	2.24	0.025	2.37	0.019	0.26	0.796	3.4	0.001	6.69	6e-09	-1.29	0.199	-0.45	0.651	0.61	0.54	2.76	0.006	3.07	0.003
cg14894144	2.8	0.005	0.29	0.775	2.13	0.035	1.83	0.073	5.09	3e-06	1.91	0.059	-0.78	0.435	3.35	0.0009	14.34	4e-34	5.19	6e-07
cg14992253	3.46	0.0006	0.94	0.348	1.88	0.061	3.97	0.0002	8.55	3e-12	1.82	0.072	-1.23	0.221	3.28	0.001	3.14	0.002	2.49	0.014
cg15988232	2.41	0.016	-1.09	0.275	1.05	0.295	4.47	4e-05	6.32	3e-08	4.2	6e-05	3.1	0.002	-1.71	0.088	13.21	3e-30	1.57	0.119
cg17099569	-2.62	0.009	0.08	0.939	0.5	0.621	-3.81	0.0003	-5.3	1e-06	0.38	0.707	-1.18	0.239	2.82	0.005	11.06	3e-23	-2.19	0.03
cg18055007	-3.11	0.002	-0.25	0.804	0.45	0.655	2.64	0.011	2.37	0.021	2.01	0.047	-0.71	0.478	4.71	3e-06	16.18	3e-40	-1.4	0.163
cg19008809	8.33	2e-16	0.48	0.633	3.3	0.001	0.49	0.625	2.57	0.012	0.5	0.615	1.08	0.281	2.99	0.003	7.07	2e-11	5.3	4e-07
cg21096399	3.15	0.002	-0.24	0.811	2.27	0.024	4.7	2e-05	8.52	3e-12	-0.15	0.879	1.24	0.217	1.23	0.219	19.47	3e-51	3.09	0.002
cg26045434	3.57	0.0004	0.15	0.884	0.57	0.572	3.43	0.001	6.62	8e-09	0.74	0.461	0.02	0.984	3.48	0.0006	4.38	2e-05	4.36	2e-05
cg26297688	4.21	3e-05	2.13	0.035	1.22	0.226	3.1	0.003	5.18	2e-06	-0.91	0.365	-0.46	0.645	2.15	0.032	12.5	6e-28	1.24	0.218
cg26453588	-2.21	0.027	-0.05	0.962	0.32	0.751	3.91	0.0002	5.98	1e-07	3.52	0.0007	0.69	0.494	1.78	0.075	14.68	3e-35	7.25	2e-11
cg00431549	-0.95	0.343	-2.95	0.004	0	0.999	-2.83	0.006	-4.03	0.0001	-1.88	0.063	0.46	0.646	-3.6	0.0004	2.51	0.013	-3.62	0.0004
cg06836772	-2.05	0.041	-0.82	0.413	-3.12	0.002	0.28	0.778	3.36	0.001	-2.88	0.005	-0.1	0.919	-5.21	3e-07	5.92	1e-08	0.9	0.369
cg07388493	-13.89	2e-40	-3.17	0.002	-4.7	5e-06	-6.39	3e-08	-5.04	4e-06	-1.87	0.065	-1.65	0.101	-1.24	0.216	-11.86	8e-26	0.37	0.714
cg09133026	-5.41	8e-08	0.86	0.392	-0.45	0.654	-3.65	0.0006	-7.04	1e-09	0.23	0.819	1.14	0.258	2.46	0.014	-11.13	2e-23	-2.17	0.031
cg14163776	-6.41	2e-10	-0.87	0.387	-2.51	0.013	-2.16	0.035	6.31	3e-08	-0.33	0.74	-0.7	0.485	-2.1	0.036	-2.44	0.015	0.26	0.792
cg14423778	-2.54	0.011	-3.31	0.001	-1.43	0.156	1.36	0.18	-2.11	0.038	0.18	0.855	-4.2	6e-05	-3.6	0.0004	-7.4	2e-12	-1.79	0.075
cg19420968	-2.41	0.016	1.07	0.286	-1.38	0.17	-2.86	0.006	-6	1e-07	1.4	0.165	0.21	0.835	5.28	2e-07	14.65	4e-35	2.32	0.022
cg19853760	-2.88	0.004	-1.29	0.199	-2.76	0.006	-3.83	0.0003	-10.32	3e-15	-0.49	0.624	-2.52	0.013	-0.57	0.571	-10.9	1e-22	-0.5	0.62
cg20240860	-9.57	7e-21	-1.49	0.139	-4.35	2e-05	-2.77	0.008	1.27	0.208	-2.08	0.04	-3.02	0.003	-2.91	0.004	-1.28	0.201	-1.81	0.072
cg22171829	-5.74	1e-08	-4.12	6e-05	-3.84	0.0002	-1.96	0.054	2.46	0.016	2.05	0.043	-0.36	0.716	0.74	0.46	9.07	4e-17	1.17	0.243
cg24899750	-4.86	1e-06	-3.07	0.002	-3.14	0.002	-2.02	0.048	-2.15	0.035	-1.36	0.177	-0.85	0.397	-0.8	0.427	-5.38	2e-07	-1.49	0.138
cg27016307	-8.17	9e-16	-1.61	0.11	-2.89	0.004	-4.93	7e-06	-5.51	7e-07	NA	0	NA	0	4.83	2e-06	6.85	6e-11	0.99	0.325
cg00374717	-2.23	0.026	0.35	0.726	-0.2	0.838	2.58	0.012	-0.53	0.596	-2	0.049	-0.34	0.731	8.1	6e-15	-1.56	0.12	-2.14	0.034
cg01027739	5.23	2e-07	0.9	0.37	2.84	0.005	0.07	0.943	4.23	8e-05	1.27	0.207	1.94	0.055	0.78	0.436	7.91	1e-13	5.71	6e-08
cg02154074	1.12	0.265	2.53	0.012	3.08	0.002	1.27	0.211	1.35	0.183	NA	0	NA	0	3.31	0.001	8.77	3e-16	2.08	0.04
cg02217159	-1.83	0.068	-0.28	0.778	-2.04	0.043	-2.04	0.046	4.93	6e-06	0.05	0.957	-0.69	0.489	-1.82	0.07	-6.06	5e-09	2.19	0.03
cg02489552	-1.34	0.181	1.44	0.151	1.54	0.125	6.94	4e-09	4.93	6e-06	1.88	0.063	0.3	0.764	2.87	0.004	13.72	5e-32	3.51	0.0006
cg02580606	-2.64	0.008	-0.41	0.683	-1.28	0.203	-2.63	0.011	-2.41	0.019	-1.16	0.25	2.3	0.023	-0.73	0.467	6.85	6e-11	-1.47	0.144
cg06462291	0.68	0.499	1.67	0.096	-0.87	0.383	2.09	0.041	8.56	3e-12	2.53	0.013	1.66	0.099	4	8e-05	22.76	9e-62	NA	0
cg06738602	-2.09	0.037	-1.94	0.054	-0.98	0.328	1.96	0.055	-0.1	0.92	1.91	0.059	2.07	0.041	-4.55	7e-06	10.82	2e-22	3.8	0.0002
cg06810647	-0.06	0.949	2.12	0.035	0.44	0.662	6.23	6e-08	7.37	4e-10	-0.66	0.508	0.93	0.355	0.35	0.728	15.83	4e-39	2.17	0.031
cg08030082	-2.59	0.01	-0.54	0.588	-1.21	0.227	-0.1	0.918	4.22	8e-05	1.52	0.131	0.26	0.797	-2.09	0.038	11.65	4e-25	2.34	0.02
cg08771731	3.68	0.0002	2.85	0.005	0.68	0.496	1.05	0.299	8.72	2e-12	0.8	0.425	0.12	0.907	1.11	0.267	7.96	7e-14	2.49	0.014
cg09191327	1.95	0.052	1.3	0.197	-0.19	0.847	3.84	0.0003	4.92	6e-06	2.09	0.039	-1.04	0.303	0.24	0.81	3.93	0.0001	3.47	0.0007
cg12830694	-2.72	0.007	1.09	0.277	-0.61	0.54	1.52	0.134	-2.44	0.017	0.07	0.944	2.27	0.025	6.1	2e-09	6.51	4e-10	-0.88	0.381
cg14258236	-2.39	0.017	0.8	0.426	1.42	0.159	-2.53	0.014	-2.69	0.009	0.5	0.616	-1.68	0.096	-2.21	0.028	4.65	5e-06	0.31	0.754
cg14308452	-8.03	3e-15	-0.52	0.604	-0.39	0.701	-1.73	0.089	-4.28	6e-05	2.32	0.022	-2.48	0.015	4.32	2e-05	-0.04	0.965	-0.29	0.769
cg14329157	1.3	0.193	2.23	0.027	1.96	0.051	1.69	0.097	6.23	4e-08	NA	0	NA	0	5.23	3e-07	12.43	1e-27	5.28	4e-07
cg14723032	-5.88	5e-09	0.15	0.883	-1.28	0.204	2.2	0.032	-4.9	7e-06	1.27	0.207	-1.15	0.253	5.04	7e-07	9.95	1e-19	-0.23	0.815
cg17063929	1.44	0.15	1.12	0.264	1.51	0.133	3.55	0.0008	7.78	7e-11	-2.24	0.028	2.52	0.013	0.57	0.566	7.37	3e-12	1.84	0.068
cg17285325	6.1	1e-09	1.23	0.22	2.55	0.012	2.28	0.026	0.88	0.382	3.22	0.002	0.61	0.545	0.49	0.621	7.3	4e-12	NA	0
cg17960516	2.91	0.004	0.14	0.886	-0.43	0.668	1.36	0.18	6.89	3e-09	1.18	0.239	-0.37	0.715	2.25	0.025	7.54	1e-12	3.86	0.0002
cg22449114	-1.48	0.14	1.06	0.291	0.53	0.597	2.87	0.006	6.5	1e-08	3.06	0.003	1.47	0.146	-1.79	0.074	13.07	8e-30	3.62	0.0004
cg23941599	-1.21	0.227	0.99	0.325	0.57	0.569	-0.09	0.926	-2.58	0.012	3.94	0.0001	1.52	0.131	-4.09	5e-05	18.66	1e-48	4.21	4e-05
cg24126851	-6.87	1e-11	-2.21	0.028	-1.79	0.076	0.39	0.697	-1.57	0.12	0.71	0.479	1.28	0.204	5.68	3e-08	13.97	8e-33	4.44	2e-05
cg24262469	-3.96	8e-05	2.77	0.006	-0.16	0.877	-1.47	0.146	3.06	0.003	0.02	0.986	-0.98	0.329	-2.82	0.005	13.35	1e-30	0.79	0.432
cg24834740	2.91	0.004	1.06	0.292	-1.49	0.137	0.33	0.746	1.93	0.057	2.72	0.008	0.38	0.702	2.76	0.006	2.94	0.004	2.67	0.008
cg26372517	-0.65	0.516	0.89	0.376	1.93	0.055	5.62	6e-07	8.41	6e-12	2.4	0.018	2.93	0.004	0.59	0.559	0.18	0.861	5.36	3e-07
cg26620959	-0.9	0.371	-0.57	0.571	-2.09	0.038	2.85	0.006	2.8	0.007	1.94	0.055	1.65	0.102	-5	9e-07	2.47	0.014	0.87	0.385
cg27169020	3.49	0.0005	1.03	0.305	1.96	0.052	3.47	0.001	8.58	3e-12	-0.16	0.877	-0.15	0.885	0.49	0.622	16.2	2e-40	5.06	1e-06
cg27494383	2.02	0.043	1.25	0.212	1.41	0.16	2.35	0.022	8.59	3e-12	NA	0	NA	0	2.37	0.018	11.22	1e-23	NA	0
cg00091693	-8.04	2e-15	0.27	0.789	-2.08	0.039	-1.6	0.115	-2.16	0.035	-1.21	0.228	-0.65	0.515	0.2	0.842	3.21	0.002	-2.76	0.006
cg00436603	2.01	0.045	-0.77	0.44	-0.28	0.778	-1.19	0.24	-4.76	1e-05	-1.47	0.144	-0.19	0.849	2.13	0.034	6.03	6e-09	2.34	0.02
cg01459453	-7.19	1e-12	-0.8	0.427	-7.87	4e-13	-6.28	5e-08	-0.48	0.632	-1.66	0.099	-3.64	0.0004	1.16	0.249	3.7	0.0003	-0.39	0.695
cg03578041	-5.18	3e-07	-1.06	0.289	-2.59	0.01	-1.74	0.088	-2.27	0.027	-1.17	0.246	-4.12	8e-05	0.28	0.781	-8.42	3e-15	-1.75	0.082
cg03891319	2.32	0.02	-3.67	0.0003	0.11	0.909	-2.84	0.006	-6.89	3e-09	0.04	0.967	-1.39	0.168	1.02	0.309	-4.83	2e-06	1.22	0.223
cg04121983	1.57	0.118	1.1	0.274	-1.36	0.176	2.2	0.032	3.15	0.002	-0.79	0.43	0.74	0.461	5.34	2e-07	3.39	0.0008	3.03	0.003
cg05903609	2.85	0.004	-2.96	0.004	-0.91	0.365	-2.81	0.007	-0.96	0.339	1.27	0.206	-2.34	0.021	-1.11	0.27	-4.3	2e-05	-0.71	0.48
cg07730301	-4.81	2e-06	-3.67	0.0003	-0.1	0.921	-4.83	1e-05	-1.75	0.085	-2.32	0.022	-0.79	0.43	-2.1	0.037	0.43	0.666	-0.17	0.866
cg10266490	-3.13	0.002	-2.27	0.024	-1.32	0.187	0.37	0.713	-3.71	0.0004	1.01	0.314	-0.75	0.452	0.92	0.357	-6.25	2e-09	-2.41	0.017
cg12616277	2.1	0.036	1.52	0.129	1.58	0.115	2.16	0.035	6.35	2e-08	2.18	0.032	-0.94	0.351	0.97	0.334	0.26	0.792	3.49	0.0006
cg13828047	-9.28	9e-20	-3.91	0.0001	-2.5	0.014	-1.04	0.304	1.48	0.144	-0.66	0.511	-1.64	0.104	-3.96	9e-05	-6.51	4e-10	-1.39	0.165
cg16419345	2.03	0.043	-0.23	0.818	-2.49	0.014	-0.66	0.51	1.12	0.269	0.99	0.323	-0.77	0.445	-3.2	0.002	8.76	4e-16	2.02	0.046
cg16984944	-8.3	3e-16	-5.21	5e-07	-0.55	0.584	-5.04	5e-06	-0.13	0.901	0.81	0.421	-1.8	0.074	2.37	0.018	2.04	0.042	0.05	0.962
cg17274064	-5.65	2e-08	-3.52	0.0006	-4.01	9e-05	-1.82	0.074	1.32	0.192	0.15	0.885	-4.17	6e-05	1.65	0.1	12.67	2e-28	1.69	0.092
cg19569684	-2.24	0.026	0.08	0.934	-0.66	0.507	2.17	0.034	-3.71	0.0004	NA	0	NA	0	2.17	0.031	-6.98	3e-11	0.59	0.553
cg21370143	-3.55	0.0004	-3.02	0.003	0.82	0.415	-3.43	0.001	-7.62	1e-10	NA	0	NA	0	-1.29	0.197	3.5	0.0005	NA	0
cg27544190	-3.5	0.0005	-2.74	0.007	-2.75	0.007	-1.28	0.206	-2.2	0.031	-1.3	0.195	-1.05	0.296	3.44	0.0006	-0.88	0.378	-1.23	0.219
cg00075967	-7.92	6e-15	1.12	0.263	-1.77	0.079	-3.96	0.0002	-1.03	0.305	0.89	0.378	-1.84	0.068	1.77	0.078	15.57	3e-38	4.96	2e-06
cg00864867	1.3	0.192	3.77	0.0002	1.66	0.099	1.07	0.288	7.92	4e-11	-0.83	0.409	0.87	0.386	-0.75	0.453	14.99	3e-36	3.13	0.002
cg02364642	-9.62	5e-21	-1.87	0.063	-5.63	8e-08	1.1	0.275	5.36	1e-06	-1.32	0.188	-4.16	7e-05	-0.58	0.563	-0.3	0.761	1.89	0.061
cg02972551	2.25	0.025	-0.25	0.806	0.48	0.63	1.39	0.171	2.88	0.005	NA	0	NA	0	2.55	0.011	6.67	2e-10	0.59	0.554
cg03103192	-1.01	0.315	0.7	0.487	-0.56	0.576	0.16	0.871	4.01	0.0002	1.16	0.249	-0.64	0.525	5.04	7e-07	6.51	4e-10	2.39	0.018
cg05365729	-1.92	0.055	-0.09	0.93	-1.45	0.149	-0.17	0.868	2.41	0.019	-0.14	0.89	-0.49	0.623	-5.17	4e-07	13.26	2e-30	2.15	0.033
cg06121469	2.08	0.038	-0.89	0.377	-0.04	0.968	-1.76	0.084	1.01	0.315	3.13	0.002	1.16	0.25	1.22	0.223	24.29	2e-66	6.1	8e-09
cg07285276	0.94	0.346	0.24	0.809	0.61	0.541	-2.87	0.006	-6.24	4e-08	0.79	0.429	0.33	0.743	3.98	8e-05	4.58	7e-06	-1.25	0.212
cg07291563	3.03	0.003	-1.11	0.271	0.82	0.415	1.09	0.281	4.03	0.0002	1.24	0.219	0.78	0.436	2.28	0.023	9.31	9e-18	1.8	0.074
cg08090772	2.08	0.038	-1.15	0.252	-0.62	0.538	3.26	0.002	3.65	0.0005	-0.77	0.445	0.83	0.406	-0.4	0.689	-2.8	0.006	NA	0
cg08124722	-2.1	0.036	-0.36	0.719	-2.82	0.005	-0.08	0.94	-1.51	0.137	NA	0	NA	0	2.4	0.017	3.01	0.003	-1.76	0.08
cg08434234	0.57	0.569	-1.07	0.286	-1.5	0.134	-0.04	0.966	3.02	0.004	-1.2	0.233	2.35	0.021	-3.34	0.0009	-0.03	0.973	2.17	0.032
cg09019938	2.48	0.013	1.36	0.175	-0.34	0.737	3.78	0.0004	6.31	3e-08	1.47	0.144	1.04	0.303	0.76	0.45	1.91	0.057	3	0.003
cg09509673	-5.05	5e-07	0.07	0.945	-0.84	0.401	0.54	0.593	1.3	0.199	-0.24	0.811	0.08	0.935	4.5	9e-06	14.17	2e-33	3.43	0.0008
cg10486998	1.46	0.144	1.52	0.13	1.48	0.142	2.09	0.041	7.02	2e-09	2.57	0.012	0.67	0.502	-0.54	0.588	3.02	0.003	1.68	0.095
cg13319175	-3.75	0.0002	-0.07	0.946	-2.89	0.004	-0.6	0.553	-1.36	0.178	-0.05	0.963	-1.14	0.256	2.36	0.019	4.1	6e-05	-1.57	0.118
cg13682722	2.45	0.014	1.1	0.272	-0.81	0.42	0.59	0.558	5.11	3e-06	NA	0	NA	0	1.99	0.047	21.67	3e-58	NA	0
cg14424579	2.05	0.041	-0.33	0.74	1.06	0.29	-0.44	0.659	0.13	0.897	0.91	0.368	1.73	0.086	2.55	0.011	12.76	9e-29	4.38	2e-05
cg15547534	2	0.045	0.03	0.974	1.18	0.239	0.4	0.69	1.55	0.126	0.77	0.443	1.77	0.079	2.11	0.036	16.89	1e-42	2.02	0.046
cg18440048	0.62	0.537	0.4	0.689	0.45	0.656	2.43	0.018	6.3	3e-08	1.16	0.247	-0.15	0.885	3.36	0.0009	7.18	9e-12	NA	0
cg18984151	-1.11	0.266	0.59	0.556	2	0.047	0.81	0.422	3.9	0.0002	0.14	0.888	-0.97	0.335	2.26	0.025	13.04	1e-29	1.28	0.201
cg19167673	2.56	0.01	-0.69	0.493	0.78	0.439	2.96	0.004	4.34	5e-05	NA	0	NA	0	1.43	0.154	1.05	0.293	2.58	0.011
cg19273182	2.74	0.006	2.56	0.011	2.05	0.042	0.31	0.759	0.23	0.818	NA	0	NA	0	-3.23	0.001	-1.19	0.234	0.17	0.866
cg19478743	2.98	0.003	1.91	0.058	-1.56	0.121	-0.73	0.471	4.61	2e-05	NA	0	NA	0	2.37	0.018	8.31	7e-15	NA	0
cg20795863	-2.3	0.021	-0.44	0.663	-1.23	0.22	-1.06	0.293	-2.65	0.01	NA	0	NA	0	5.26	2e-07	9.14	3e-17	-0.36	0.721
cg21460081	0.71	0.481	0.66	0.509	-0.35	0.729	0.15	0.879	-1.39	0.168	3.18	0.002	0.86	0.393	-3.93	0.0001	4.41	2e-05	2.76	0.007
cg22289837	-1.86	0.064	0.18	0.855	-0.5	0.616	0.46	0.648	2.51	0.015	0.74	0.463	0.01	0.995	2.34	0.02	9.37	6e-18	5.53	1e-07
cg22679120	-2.96	0.003	2.17	0.031	-1.03	0.306	0.67	0.504	-0.08	0.934	0.85	0.396	-0.28	0.777	-3.91	0.0001	6.25	2e-09	1.07	0.286
cg25070637	2.1	0.036	0.11	0.909	-0.5	0.615	2.41	0.019	6.92	2e-09	0.42	0.672	-0.41	0.686	-0.31	0.756	-1.93	0.055	3.23	0.001
cg25552492	-1	0.319	1.53	0.128	-0.56	0.579	4.2	9e-05	6.44	2e-08	1.77	0.079	0.19	0.853	1.77	0.078	2.94	0.004	5.12	9e-07
cg27319898	2.31	0.021	1.69	0.094	0.22	0.829	2.76	0.008	7.36	4e-10	NA	0	NA	0	1.24	0.215	0.89	0.374	3.85	0.0002
cg01234063	1.99	0.047	1.06	0.291	-0.6	0.55	1.54	0.129	3.36	0.001	1.34	0.183	-0.29	0.775	2.67	0.008	-0.64	0.52	2.79	0.006
cg01262913	2.34	0.019	0.01	0.994	-1.25	0.211	-0.34	0.732	7.06	1e-09	NA	0	NA	0	-6.55	2e-10	-0.29	0.77	-6.56	7e-10
cg01407797	-1.74	0.082	-1.56	0.12	-2.54	0.012	-3.11	0.003	-3.86	0.0003	-0.68	0.497	-1.53	0.129	0.5	0.621	-8.85	2e-16	1.2	0.231
cg01560871	-12.58	6e-34	-3.28	0.001	-5.83	3e-08	-5.34	2e-06	-0.71	0.477	NA	0	NA	0	0.79	0.43	0.64	0.521	-1.29	0.2
cg02275294	-1.43	0.153	-1.01	0.316	-3.88	0.0002	-0.42	0.679	3.13	0.003	-1.84	0.068	-1.7	0.092	-1.62	0.106	-13.39	7e-31	2.22	0.028
cg04268405	-2.3	0.022	0.68	0.496	0.46	0.643	1.09	0.279	-0.55	0.583	-0.58	0.561	-2.8	0.006	-3.04	0.003	-6.57	3e-10	1.59	0.113
cg05590257	-1.1	0.27	2.02	0.045	0.37	0.709	-1.23	0.223	2.56	0.013	NA	0	NA	0	-3.51	0.0005	-2.64	0.009	1.73	0.085
cg06044899	2.21	0.027	-1.26	0.211	-0.16	0.87	0.32	0.751	4.31	6e-05	NA	0	NA	0	-4.1	5e-05	-2.13	0.034	0.19	0.847
cg06513075	2.01	0.045	0.23	0.817	-0.27	0.791	0.05	0.959	1.57	0.122	0.85	0.395	0.14	0.889	2.39	0.018	3.93	0.0001	3.38	0.0009
cg07770222	-1.64	0.101	-0.9	0.37	-0.04	0.966	-2.11	0.04	2.45	0.017	0.57	0.573	-0.64	0.523	4.24	3e-05	-0.16	0.872	2.17	0.031
cg09646392	-0.46	0.643	-4.33	3e-05	-1.48	0.142	-1.34	0.185	-2.5	0.015	-0.66	0.509	-2.81	0.006	-5.53	6e-08	-0.62	0.536	1.31	0.193
cg13269407	-2.36	0.018	-2.06	0.041	-0.54	0.59	-2.66	0.01	-0.78	0.439	-0.92	0.361	-1.57	0.12	1	0.321	-2.62	0.009	0.62	0.533
cg14408969	2.3	0.022	0.48	0.631	-1.89	0.06	0.43	0.671	3.67	0.0005	0.77	0.446	0.89	0.374	-2.64	0.009	-0.42	0.672	2.89	0.004
cg14727952	1.28	0.199	-0.37	0.713	-0.37	0.712	-2.13	0.038	3	0.004	-0.84	0.402	0.52	0.608	3.41	0.0007	-1.82	0.07	2.29	0.024
cg16358826	1.52	0.129	0.76	0.447	-0.3	0.766	2.23	0.03	4.15	0.0001	0.91	0.364	1.47	0.145	2.26	0.024	-0.86	0.39	2.83	0.005
cg19046959	-1.37	0.172	-1.91	0.058	-2.21	0.028	-4.96	7e-06	-1.53	0.13	NA	0	NA	0	-5.3	2e-07	-8.3	8e-15	NA	0
cg21305265	2.58	0.01	0.37	0.711	-0.69	0.492	-0.03	0.978	2.38	0.02	1.23	0.22	0.28	0.777	4.24	3e-05	-1.26	0.21	2.29	0.023
cg22613010	-0.2	0.841	-3.6	0.0004	-2.28	0.024	-3.58	0.0007	-2.69	0.009	0.12	0.905	-0.87	0.388	1.38	0.168	-1.04	0.301	0.67	0.503
cg24081819	-1.85	0.065	0.43	0.667	-4.31	3e-05	-1.5	0.14	8.6	2e-12	-0.68	0.495	1.49	0.139	0.94	0.349	4.89	2e-06	2.07	0.04
cg24471894	-1.9	0.058	-0.93	0.354	-0.41	0.679	-3.13	0.003	-2.12	0.038	NA	0	NA	0	-3.83	0.0001	-7.03	2e-11	1.84	0.068
cg24888049	-2.25	0.025	-1.73	0.085	-2.05	0.042	-0.03	0.977	-7.44	3e-10	NA	0	NA	0	1.14	0.255	-5.68	4e-08	1.96	0.051
cg25101936	-1.72	0.087	0.7	0.484	-2.55	0.012	2.74	0.008	-0.96	0.343	NA	0	NA	0	-4.98	9e-07	0.99	0.323	4.18	5e-05
cg26723847	-3.87	0.0001	-0.57	0.568	-0.92	0.358	3.15	0.003	2.61	0.011	0.57	0.567	-1.53	0.13	-1.36	0.174	-3.3	0.001	-1.12	0.265
cg00945507	-1.27	0.206	-1.59	0.114	0.21	0.835	3.16	0.002	-1.39	0.169	1.12	0.267	-0.75	0.456	3.49	0.0005	-2.07	0.04	1.02	0.308
cg01584473	-4.25	2e-05	1.33	0.185	1	0.318	-1.53	0.131	0.73	0.467	-0.83	0.409	-0.13	0.895	4.5	9e-06	12.43	1e-27	-0.08	0.936
cg01656216	-0.76	0.447	-1.12	0.264	0.76	0.447	NA	0	0.28	0.783	2.63	0.01	-0.47	0.636	2.02	0.044	-3.43	0.0007	0.74	0.461
cg02827112	2.05	0.04	0.45	0.652	0.32	0.753	0.55	0.584	5.86	2e-07	-0.59	0.556	-0.48	0.629	1.76	0.08	7.62	6e-13	NA	0
cg03167275	2.35	0.019	0.19	0.853	-1.01	0.315	1.8	0.078	6.91	2e-09	0.2	0.84	0.11	0.91	-1.72	0.087	1.56	0.12	3.2	0.002
cg03565323	-2.59	0.01	-1.81	0.073	-0.92	0.357	-4.07	0.0001	3.63	0.0006	0.34	0.735	-1.44	0.153	0.17	0.867	-0.83	0.405	0.14	0.886
cg03760483	-1.7	0.089	0.84	0.4	0.3	0.766	0.73	0.468	3.55	0.0007	1.09	0.279	0.94	0.35	1.9	0.058	12.31	3e-27	7.12	4e-11
cg04126866	1.01	0.312	3.7	0.0003	1.26	0.21	-0.09	0.93	5.77	2e-07	0.3	0.767	0.98	0.331	0.95	0.341	-2.99	0.003	0.88	0.381
cg05921699	-2.41	0.016	0.14	0.893	-0.89	0.374	-0.05	0.96	4.13	0.0001	NA	0	NA	0	1.03	0.305	4.25	3e-05	1.73	0.085
cg05960024	-2.51	0.012	0.47	0.636	0.02	0.986	1.05	0.298	0.37	0.712	2.79	0.006	1.04	0.301	0.53	0.597	1.38	0.169	2.47	0.014
cg06557358	1.53	0.126	0.24	0.809	-0.59	0.553	1.16	0.251	6.65	7e-09	-0.38	0.703	0.28	0.781	2.18	0.03	0.9	0.369	3.41	0.0008
cg06952310	0.85	0.396	-0.28	0.783	0.68	0.501	-2.39	0.02	-5.58	5e-07	0.89	0.377	-0.23	0.817	1.81	0.072	4.53	9e-06	1.77	0.079
cg09418283	2	0.046	2.94	0.004	-0.54	0.587	0.83	0.408	9.08	4e-13	-1.25	0.213	1.03	0.304	1.63	0.104	1.73	0.085	NA	0
cg12768605	-1.84	0.066	0.17	0.862	0.01	0.994	2.21	0.031	3.79	0.0003	1.77	0.08	0.66	0.512	-3.23	0.001	-0.34	0.735	0.6	0.549
cg14501253	1.89	0.059	1.52	0.131	-0.47	0.639	1.71	0.092	7.9	4e-11	1.57	0.12	-0.14	0.891	2.53	0.012	0.55	0.581	2.53	0.012
cg15381769	2.12	0.034	2.12	0.035	1.4	0.164	3.03	0.004	1.84	0.07	0.37	0.709	0.39	0.7	-1.53	0.126	0.71	0.481	0.82	0.416
cg16150435	-1.7	0.089	0.54	0.589	0.49	0.623	-1.71	0.092	-2.15	0.035	0.88	0.383	0.87	0.388	2.38	0.018	6.5	5e-10	NA	0
cg16494477	2.82	0.005	0.62	0.538	-0.53	0.594	1.76	0.084	6.4	2e-08	NA	0	NA	0	-0.8	0.427	1.99	0.047	NA	0
cg17853587	0.06	0.949	-1.06	0.289	-0.25	0.804	1.8	0.076	6.17	5e-08	1.48	0.141	0.67	0.506	4.63	5e-06	1.17	0.244	2.1	0.037
cg18983672	-2.8	0.005	-0.84	0.405	0.45	0.655	1.36	0.181	0.18	0.856	0.25	0.805	-1.76	0.082	-3.63	0.0003	9.59	1e-18	-1.28	0.201
cg20295671	0.31	0.753	0.81	0.419	1.05	0.294	1.75	0.086	1.26	0.211	3.88	0.0002	3.7	0.0004	3.22	0.001	1.17	0.241	1.09	0.275
cg20947775	2.85	0.004	-0.77	0.442	0.87	0.383	0.48	0.63	2.51	0.015	0.53	0.595	0.59	0.557	3.74	0.0002	0.53	0.595	0.74	0.458
cg20999813	2.24	0.025	0.5	0.619	0.14	0.891	-0.05	0.958	3.26	0.002	1.01	0.313	-0.44	0.664	3.25	0.001	0.31	0.754	1.3	0.196
cg22006386	2.17	0.031	0.12	0.902	1.65	0.1	-1.12	0.269	2.53	0.014	-0.31	0.759	0.29	0.769	0.6	0.552	5.72	3e-08	1.61	0.109
cg22432269	2.81	0.005	0.09	0.927	1.24	0.216	1.76	0.084	1.94	0.057	-0.53	0.595	0.14	0.89	2.64	0.009	1.11	0.27	2.27	0.025
cg23662675	0.83	0.407	-1.03	0.307	1.75	0.082	0.74	0.462	0.06	0.956	-0.06	0.952	2.72	0.008	3.92	0.0001	14.97	3e-36	0.48	0.633
cg24254120	1.16	0.248	1.41	0.16	-0.43	0.666	0.01	0.995	1.48	0.143	1.28	0.204	-0.1	0.921	3.2	0.001	5.87	1e-08	4.75	5e-06
cg24580001	-3.07	0.002	-0.52	0.602	0.73	0.469	0.52	0.608	-4.07	0.0001	-0.11	0.912	-0.51	0.614	1.09	0.276	5.85	2e-08	NA	0
cg25683012	2.01	0.045	-1.36	0.175	-0.76	0.448	0.61	0.547	1.91	0.06	0.64	0.521	-0.39	0.694	-0.27	0.79	-8.69	6e-16	2.41	0.017
cg25781123	3.29	0.001	-0.83	0.406	1.13	0.26	-0.25	0.803	3.95	0.0002	-0.96	0.339	-1.06	0.292	-0.05	0.961	9.73	5e-19	1.05	0.295
cg26003813	1.79	0.073	0.18	0.856	0.17	0.867	2.27	0.027	4.75	1e-05	NA	0	NA	0	1.38	0.168	1.3	0.194	2.99	0.003
cg27413543	3.27	0.001	-0.82	0.411	0.14	0.891	-0.21	0.837	3.71	0.0004	-0.35	0.731	-0.34	0.737	1.53	0.128	-1.91	0.058	2.1	0.038
cg01027805	3.12	0.002	-1.38	0.169	2.19	0.03	2.26	0.027	1.87	0.066	0.15	0.878	-1.98	0.05	-0.2	0.845	-0.85	0.394	NA	0
cg03286783	2.44	0.015	1.91	0.058	0.33	0.745	0.61	0.545	1.49	0.14	-0.29	0.773	0.32	0.748	3.52	0.0005	-2.72	0.007	NA	0
cg04094160	1.19	0.235	1.48	0.141	-0.93	0.354	-0.33	0.746	2.68	0.009	-0.01	0.989	0.21	0.831	3.02	0.003	0.28	0.777	2.56	0.011
cg04431054	-5.59	3e-08	-1.94	0.054	0.27	0.786	-2.44	0.018	0.68	0.502	NA	0	NA	0	1.51	0.131	-5.73	3e-08	-0.61	0.544
cg04452713	-0.57	0.57	-1.68	0.094	-1.62	0.107	2.7	0.009	3.32	0.001	-0.74	0.458	1.33	0.188	-0.61	0.541	-0.92	0.36	6.4	2e-09
cg07663789	1.07	0.286	-0.32	0.746	-1.27	0.205	1.89	0.063	5.77	2e-07	-1.65	0.103	0.85	0.398	4.38	2e-05	2.15	0.033	1.31	0.191
cg09722397	2.38	0.017	-0.74	0.463	-0.32	0.751	0.32	0.754	2.26	0.027	3.43	0.0009	0.26	0.793	-0.74	0.46	-0.68	0.5	1.89	0.061
cg09722555	-2.45	0.015	-1.26	0.209	-0.52	0.607	-0.12	0.907	-3.06	0.003	0.01	0.989	-0.34	0.731	6.03	4e-09	1.4	0.164	-0.12	0.907
cg10045881	-0.47	0.638	-0.5	0.616	-0.2	0.844	0.84	0.403	-6.54	1e-08	1.69	0.095	-2.75	0.007	-5.4	1e-07	-0.21	0.83	0.04	0.971
cg10345936	-1.13	0.258	0.04	0.97	0.37	0.709	-4.37	5e-05	-6.61	8e-09	1.3	0.196	0.74	0.461	0.54	0.59	5.28	3e-07	-0.99	0.324
cg12413566	-0.41	0.68	2.47	0.014	-0.45	0.654	-1.45	0.154	-2.17	0.034	-0.09	0.926	0.13	0.898	0.98	0.326	3.56	0.0004	-0.46	0.647
cg14409958	0.46	0.644	0.83	0.41	NA	0	NA	0	3.26	0.002	-0.12	0.907	-0.25	0.805	-0.43	0.667	4.07	6e-05	2.19	0.03
cg15185286	2.58	0.01	0.13	0.897	0.22	0.824	1.43	0.158	0.83	0.408	0.26	0.797	0.88	0.38	2.99	0.003	-0.06	0.951	3.47	0.0007
cg15703512	2.78	0.005	-1.15	0.253	0.26	0.793	-0.11	0.913	0.83	0.408	0.52	0.602	-0.85	0.4	-4.28	2e-05	-4.74	4e-06	0.13	0.897
cg16168311	0.04	0.969	-3.94	0.0001	-1.78	0.077	-2.94	0.005	-1.66	0.101	1.5	0.136	-1.77	0.08	-5.18	3e-07	1.1	0.272	0.15	0.879
cg16899442	-4.43	1e-05	-1.22	0.225	-0.39	0.696	-0.52	0.602	2.31	0.024	0.69	0.491	-1.48	0.142	-6.01	4e-09	-1.8	0.074	0.67	0.507
cg17338403	0.69	0.488	-1.57	0.118	0.14	0.887	0.92	0.359	3.9	0.0002	1.14	0.255	-1.6	0.112	-0.36	0.716	-13.07	8e-30	-4.48	1e-05
cg18956095	4.32	2e-05	-1.87	0.063	-0.59	0.554	-1.17	0.247	2.7	0.009	0.82	0.414	-0.17	0.862	0.26	0.796	-3.64	0.0003	1.08	0.283
cg19044674	3.41	0.0007	1.1	0.273	-1.16	0.247	0.18	0.861	3.3	0.002	0.6	0.552	-2.07	0.041	0.99	0.325	-1.41	0.161	0.95	0.343
cg22637507	3.33	0.0009	0.4	0.693	1.78	0.078	-0.04	0.966	1.08	0.286	0.45	0.656	0.29	0.776	-2.32	0.021	3.39	0.0008	1.31	0.194
cg25159610	-0.4	0.688	1.47	0.145	-3.06	0.003	-1.3	0.199	1.52	0.133	1.32	0.189	0.65	0.519	5.69	2e-08	6.17	3e-09	-1.44	0.151
cg25166896	-0.22	0.829	-1.84	0.068	-0.3	0.764	-3.87	0.0003	-0.07	0.946	-0.74	0.463	-1.97	0.051	0.38	0.708	-2.88	0.004	2.33	0.021
cg25411725	-3.33	0.0009	1.2	0.232	-1.83	0.069	1.18	0.242	2.56	0.013	NA	0	NA	0	6.99	1e-11	0.2	0.838	0.73	0.465
cg26394940	-4.08	5e-05	-2.45	0.015	-1.96	0.052	-1.81	0.076	-1.78	0.08	-0.81	0.422	-0.86	0.391	0.16	0.87	-6.4	8e-10	1.45	0.148
cg26456957	1.76	0.079	0.6	0.552	-0.24	0.808	0.3	0.767	-0.25	0.805	2.29	0.024	0.57	0.567	4.34	2e-05	0.11	0.915	2.77	0.006
cg27202708	-3.22	0.001	-0.59	0.559	0.66	0.513	1.54	0.129	2.27	0.026	0.46	0.648	-1.2	0.232	-6.3	8e-10	-0.5	0.616	-0.33	0.74
cg05755779	0.02	0.986	1.66	0.098	2.89	0.004	1.09	0.282	0.81	0.423	0.03	0.977	-0.22	0.83	-3.27	0.001	0.46	0.647	NA	0
cg06993413	2.18	0.029	1.27	0.205	1.8	0.074	-0.8	0.427	-1.05	0.296	0.84	0.405	0.93	0.353	1.29	0.199	14.36	4e-34	-0.13	0.899
cg08251036	-0.97	0.333	0.44	0.657	-0.25	0.803	-0.43	0.668	0.46	0.645	-0.36	0.717	-1.14	0.258	-4.1	5e-05	3.32	0.001	-0.16	0.876
cg09785172	3.18	0.002	0.32	0.747	0.15	0.883	0.26	0.798	0.91	0.366	NA	0	NA	0	-0.03	0.977	0.29	0.775	2.26	0.025
cg09869858	-2.17	0.03	1.76	0.079	-1.5	0.134	0.37	0.711	-1.26	0.211	NA	0	NA	0	5.27	2e-07	0.45	0.654	0.91	0.363
cg10376763	-2.18	0.03	0.38	0.704	-1.43	0.156	NA	0	-0.63	0.528	-0.4	0.688	-0.09	0.931	-2.94	0.004	-1.29	0.198	-1.85	0.067
cg10920957	1.95	0.052	-0.03	0.976	0.21	0.837	2.24	0.029	4.59	2e-05	1.04	0.302	1.18	0.242	0.09	0.929	0.63	0.532	NA	0
cg13038560	-1.36	0.174	1.18	0.238	0.47	0.636	-1.68	0.098	-1.33	0.19	1.37	0.174	0.9	0.369	5.12	5e-07	-1.16	0.246	2.28	0.024
cg15341340	3.04	0.002	-0.42	0.678	-1.05	0.294	-0.24	0.813	3.66	0.0005	0.87	0.387	-1.32	0.191	-1.54	0.124	0.76	0.447	0.4	0.689
cg15661409	-1.07	0.285	-1	0.318	-0.02	0.988	NA	0	0.48	0.632	1.59	0.116	1.38	0.17	-2.98	0.003	6.25	2e-09	1.67	0.097
cg15974053	-0.07	0.946	-1.19	0.236	0.1	0.92	-1.19	0.241	4.21	8e-05	0.42	0.678	1.07	0.287	0.2	0.841	0.82	0.415	9.25	2e-16
cg16579101	3.11	0.002	-0.84	0.402	-1.31	0.193	-0.63	0.531	1.96	0.055	-0.27	0.791	-1.51	0.133	2.38	0.018	0.3	0.766	1.78	0.077
cg17408647	2.78	0.005	0.62	0.537	-0.99	0.322	-1.08	0.284	0.41	0.683	NA	0	NA	0	2.84	0.005	-0.45	0.654	0.65	0.516
cg19305227	-1.22	0.224	1.8	0.074	0.57	0.568	-0.61	0.544	-4.13	0.0001	0.71	0.482	0.83	0.41	-0.39	0.694	2.4	0.017	0.95	0.342
cg19346193	-0.49	0.622	1.86	0.065	-0.31	0.756	-2.82	0.007	-3.54	0.0008	-0.12	0.906	1.67	0.097	-0.79	0.432	-1.28	0.202	-0.88	0.383
cg20524216	2.64	0.008	-0.38	0.705	-0.62	0.536	-1.26	0.211	0.81	0.423	-0.08	0.936	-1.32	0.188	0	0.998	1.28	0.201	2.2	0.029
cg22920873	1.02	0.309	0.64	0.52	-0.73	0.465	0.25	0.801	1.17	0.247	1.36	0.178	0.22	0.824	3.94	9e-05	12.55	4e-28	NA	0
cg25505610	1.81	0.07	-1.25	0.214	-0.38	0.703	0.19	0.852	1.25	0.216	NA	0	NA	0	3.05	0.002	15.02	2e-36	0.45	0.655
cg27092035	3.14	0.002	0.99	0.326	0.33	0.744	1.31	0.197	2.4	0.019	-1.55	0.124	0.64	0.524	1.2	0.229	-0.22	0.827	NA	0
cg01485645	3.7	0.0002	-1.38	0.17	-0.31	0.758	-0.99	0.324	2.8	0.007	-0.73	0.467	0.44	0.658	1.25	0.212	0.28	0.783	-0.05	0.961
cg01570885	-0.2	0.845	-1.13	0.258	-0.16	0.874	-1.29	0.202	2.81	0.007	NA	0	NA	0	3.99	8e-05	-1.97	0.05	0.95	0.344
cg02047577	1.7	0.09	-0.64	0.52	-0.07	0.943	0.3	0.764	0.89	0.376	0.37	0.71	-1.11	0.268	2.79	0.006	-0.98	0.327	2.52	0.013
cg03682823	1.49	0.137	1.13	0.262	0.56	0.577	-0.4	0.69	2.37	0.021	0.96	0.338	1.56	0.123	-1.48	0.141	-3.54	0.0005	-0.34	0.735
cg04005032	2.2	0.028	1.25	0.213	0.91	0.365	0.13	0.896	4.12	0.0001	-0.43	0.665	-1.58	0.117	1.62	0.106	0.36	0.718	NA	0
cg04999691	0.18	0.856	-1.51	0.133	0.58	0.565	-0.83	0.409	-2.62	0.011	1.54	0.127	0.24	0.809	-1.32	0.189	-9.78	3e-19	NA	0
cg05847778	2.1	0.036	-0.38	0.705	0.87	0.387	1.84	0.07	0.94	0.349	0.48	0.629	-0.6	0.547	0.22	0.826	-0.43	0.668	3.53	0.0005
cg06117855	0.58	0.565	-2.97	0.003	0.39	0.695	-1.21	0.231	0.46	0.649	NA	0	NA	0	-0.54	0.588	-10	7e-20	0.06	0.955
cg06688848	2.07	0.039	0.08	0.935	-0.57	0.571	-0.03	0.977	1.77	0.081	0.31	0.76	0.44	0.661	-0.15	0.88	1.18	0.238	2.16	0.033
cg06926735	1.22	0.224	0	0.997	-0.4	0.69	-0.12	0.904	2.87	0.006	-0.91	0.363	-0.13	0.9	1.9	0.058	3.13	0.002	1.43	0.155
cg07498421	1.57	0.116	-0.72	0.473	0.52	0.601	0.28	0.779	2.21	0.031	1.9	0.06	-0.84	0.402	3.56	0.0004	0.44	0.66	1.44	0.152
cg07849904	3.47	0.0005	-0.97	0.334	1.57	0.118	-0.1	0.923	2.42	0.019	0.61	0.541	-1.94	0.055	-1.53	0.127	-0.45	0.656	1.31	0.192
cg08186124	2.92	0.004	-0.41	0.684	-0.57	0.567	1.14	0.258	0.79	0.434	0.73	0.465	1.4	0.163	2.15	0.033	0.4	0.69	1.48	0.14
cg09441152	3	0.003	-0.46	0.644	-0.64	0.521	0.37	0.715	3.59	0.0006	0.42	0.674	1.13	0.259	1.05	0.293	-1.19	0.236	0.94	0.347
cg10940099	2.26	0.024	-0.36	0.722	-0.23	0.817	-0.54	0.592	0.19	0.849	0.16	0.876	1.48	0.142	-0.01	0.99	-0.57	0.567	2.78	0.006
cg11388238	0.78	0.437	-0.5	0.62	-0.2	0.841	-0.02	0.987	-1.08	0.282	1.04	0.3	-2.06	0.042	-1.94	0.053	-8.93	1e-16	-0.24	0.807
cg12985418	2.99	0.003	-1.34	0.183	-0.1	0.922	1.66	0.102	0.27	0.788	-1.9	0.061	-1	0.319	-2.8	0.005	-0.37	0.712	0.85	0.397
cg14060828	-1.12	0.261	-0.98	0.326	-0.45	0.654	1.01	0.316	3.09	0.003	1.15	0.252	1.61	0.11	-2.68	0.008	-0.2	0.838	-1.1	0.271
cg14597908	-1.08	0.279	0.14	0.887	-0.61	0.54	-0.09	0.925	4.69	1e-05	1.24	0.219	-0.54	0.589	-0.16	0.871	-2.7	0.007	0.97	0.332
cg14654875	0.22	0.829	0	0.996	0.06	0.953	0.32	0.749	1.86	0.067	-0.24	0.808	0.19	0.848	3.47	0.0006	-2.18	0.03	0.9	0.369
cg16408394	1.74	0.081	-1.32	0.187	-1.17	0.243	-0.76	0.448	2.45	0.017	-1.22	0.224	-0.15	0.88	-0.93	0.355	0.25	0.801	3.03	0.003
cg18031008	1.98	0.048	-0.92	0.361	-0.79	0.428	-1.35	0.181	1.64	0.106	1.16	0.25	1.45	0.149	5	8e-07	0.2	0.843	1.68	0.095
cg18139769	0.28	0.778	-0.87	0.388	0.76	0.45	0.82	0.418	2.47	0.016	1.45	0.15	1.33	0.188	-1.14	0.254	-3.69	0.0003	0.48	0.631
cg19706682	-0.42	0.676	-0.08	0.939	-0.04	0.969	-0.3	0.764	1.56	0.125	0.6	0.552	-1.36	0.177	-7.1	5e-12	-9.16	2e-17	1.58	0.116
cg20100381	1.23	0.218	-1.52	0.131	-1.68	0.094	-0.04	0.967	4.34	5e-05	-0.23	0.822	0.35	0.727	3.56	0.0004	-1.71	0.088	NA	0
cg21211748	2.21	0.027	-1.29	0.199	-1.68	0.095	0.69	0.49	1	0.321	0.87	0.384	-2.34	0.021	0.66	0.51	-0.91	0.366	1.1	0.272
cg23092072	1.82	0.069	0.48	0.633	1.34	0.182	-0.16	0.877	0.82	0.417	0.98	0.332	-0.79	0.431	0.44	0.663	3.22	0.001	3.76	0.0002
cg25657834	0.12	0.905	-0.05	0.959	-0.79	0.428	1.22	0.227	5.11	3e-06	-0.49	0.624	-0.68	0.498	-0.94	0.348	-1.06	0.291	2.42	0.017
cg25928579	0.09	0.932	-0.49	0.627	0.02	0.982	-0.1	0.919	2.72	0.008	-0.26	0.793	1.28	0.204	1.92	0.055	6.15	3e-09	0.88	0.38
cg26043391	2.05	0.04	0.52	0.602	0.18	0.855	-3.27	0.002	-0.29	0.776	NA	0	NA	0	1.04	0.297	-1.97	0.05	NA	0
cg26162695	-0.07	0.944	-2.15	0.033	-0.57	0.573	-0.58	0.563	-0.47	0.637	0.21	0.835	0.92	0.361	2.03	0.044	-0.41	0.683	NA	0
cg03588357	0.15	0.881	0.04	0.97	0.7	0.483	-0.49	0.628	1.84	0.071	-0.16	0.876	-0.73	0.47	2.38	0.018	1.88	0.061	NA	0
cg07455279	-0.5	0.616	0.52	0.605	-0.46	0.643	1.21	0.232	1.27	0.209	0.2	0.844	-0.25	0.806	2.53	0.012	1.21	0.229	0.2	0.846
cg07595943	-0.43	0.665	-1.11	0.268	0.01	0.989	-0.41	0.686	-1.38	0.172	NA	0	NA	0	1.82	0.07	2.75	0.006	-0.62	0.535
cg10377274	-1	0.319	0.03	0.978	0.1	0.919	-1.53	0.132	-5.33	1e-06	NA	0	NA	0	-0.53	0.6	1.5	0.134	-0.39	0.7
cg18180783	-1.57	0.116	0.27	0.787	-0.86	0.389	-1.67	0.101	-1.04	0.304	NA	0	NA	0	0.41	0.683	4.97	1e-06	0.02	0.984
cg19514928	-0.48	0.632	-0.74	0.459	-1	0.317	-0.85	0.399	3.34	0.001	-1.28	0.203	-0.41	0.681	-0.23	0.82	-0.3	0.766	0.54	0.592
cg20828084	-1.57	0.116	0.73	0.464	-0.99	0.324	0.33	0.746	0.25	0.8	-0.34	0.733	-1.04	0.302	1.72	0.087	8.3	8e-15	0.14	0.892
cg21378206	-1.7	0.089	-0.16	0.875	-0.23	0.815	-0.62	0.537	-1.55	0.125	-1.09	0.28	3.01	0.003	0.81	0.421	0.95	0.346	0.61	0.544
cg27377450	-2.42	0.016	-0.28	0.779	-0.57	0.572	1.14	0.261	-0.12	0.909	-0.03	0.977	-1.49	0.14	-0.17	0.866	0.59	0.557	0.35	0.73
cg02335441	-1.21	0.227	-0.1	0.922	0.74	0.46	-0.45	0.652	0.01	0.991	0.56	0.575	-1.2	0.233	-0.05	0.96	-3.93	0.0001	-1.92	0.057
cg11025793	1.36	0.176	1.18	0.24	-0.38	0.704	3.31	0.002	0.42	0.676	1.63	0.106	-0.04	0.965	-1.67	0.097	-1.55	0.123	1.83	0.069
cg11653266	1.45	0.148	0.56	0.578	0.7	0.484	1.2	0.235	2.92	0.005	NA	0	NA	0	1.52	0.13	-0.27	0.791	0.91	0.362
cg15262928	2.92	0.004	-1.02	0.308	-1.4	0.163	0.51	0.614	0.72	0.473	-0.08	0.937	0.98	0.33	-0.71	0.477	-0.43	0.671	1.5	0.137
cg21395782	1.71	0.087	0.59	0.555	0.06	0.949	-0.03	0.976	0.02	0.983	0.11	0.915	0.01	0.988	-2.25	0.025	-1.79	0.075	0.69	0.491
cg21950518	0.31	0.754	-0.51	0.614	0.92	0.357	0.58	0.563	6.02	9e-08	0.27	0.786	-0.38	0.703	0.46	0.645	-1.13	0.26	NA	0
cg22190114	-0.56	0.574	1.42	0.156	-0.44	0.658	-1.89	0.063	-2.08	0.041	NA	0	NA	0	-0.35	0.727	-1.01	0.315	0.27	0.784
cg22568540	-2.33	0.02	-1.72	0.088	0.66	0.51	-0.82	0.414	-0.19	0.849	NA	0	NA	0	-0.17	0.867	-1.15	0.25	1.97	0.05
cg23180365	0.59	0.557	-0.36	0.722	-1.3	0.194	-1.14	0.257	2.4	0.019	-0.69	0.489	1.52	0.13	0.67	0.506	-0.15	0.877	NA	0
cg23786576	1.32	0.188	-2.52	0.013	-0.38	0.703	-1.8	0.078	0.12	0.906	0.21	0.833	1.16	0.251	-1.11	0.268	-1.13	0.259	1.24	0.219
cg26824091	1.96	0.05	1.11	0.269	1.5	0.137	-1.02	0.311	-1.28	0.204	-0.47	0.637	1.26	0.209	1.41	0.161	15.71	1e-38	1.78	0.078
cg01873645	1.88	0.06	0.16	0.876	0.24	0.808	1.54	0.129	0.53	0.6	NA	0	NA	0	0.89	0.374	0.94	0.347	1.88	0.062
cg09885951	1.54	0.125	-1.23	0.22	-0.34	0.733	0.75	0.459	1.52	0.134	-0.47	0.641	1.65	0.103	1.28	0.202	0.99	0.323	1.59	0.114
cg20305610	1.01	0.312	0.03	0.972	0.14	0.888	0.18	0.854	-0.4	0.691	-0.18	0.858	1.22	0.226	-0.24	0.81	-1.46	0.147	1.47	0.143
cg24116886	-1	0.316	1.54	0.126	0.93	0.354	2	0.05	-0.02	0.981	-1.13	0.262	-1.67	0.099	-1.7	0.091	-0.1	0.923	-0.81	0.42
cg24450312	0.62	0.535	-0.04	0.972	1.5	0.136	0.52	0.603	1.96	0.054	0.42	0.678	-1.56	0.122	0.44	0.661	0.81	0.42	0.28	0.782
cg03947362	1.16	0.246	-1.21	0.228	-0.13	0.896	-1.08	0.284	0.41	0.681	1.57	0.119	0.22	0.826	-0.57	0.569	-1.13	0.261	1.37	0.173
